# Supplementary material for: Identification of Recurrent Activating HER2 Mutations in Primary Canine Pulmonary Adenocarcinoma
Source: Oxford University Press journal article supplement (doi:10.1158/1078-0432.ccr-19-1145), 2019-08-20
Supplement: 10780432ccr191145-sup-220191_2_supp_5650896_pxr2gs.xlsx [file 10780432ccr191145-sup-220191_2_supp_5650896_pxr2gs.xlsx]

## Sheet: Supplementary Table 1
Supplementary Table 1. Informatic tools utilized in primary canine lung cancer analysis
Sequencing Platform	Tool	Version	Flags	Flag Purpose and/or Parameters where Applicable
Exome	BWA	0.7.8	-R "${RGTAG}"	RGTAGs consists of the flowcell ID, lane number and the library tag ID specific for every library prep and assay type
			-M
			-t	8
	GATK- Recalibrate	3.3.0	-nct	8
			--disable_indel_quals
			-knownsites	Known SNPs from dbSNP
			-cov	QualityScoreCovariate
			-cov	ReadGroupCovariate
			-cov	CycleCovariate
			-cov	ContextCovariate
	GATK- MarkDups	3.3.0	ASSUME_SORTED	TRUE
			REMOVE_DUPLICATES	FALSE
			MAX_RECORDS_IN_RAM	18000000
			CREATE_INDEX	TRUE
			VALIDATION_STRINGENCY	SILENT
	GATK - RealignerTargetCreator	3.3.0	-nt	16
			--maxIntervalSize	350
			-DBQ	1
	GATK-IndelRealigner	3.3.0	-DBQ	1
			--maxReadsInMemory	5000000
			--maxConsensuses	24
			--maxReadsForConsensuses	80
			--maxReadsForRealignment	12000
			-model	KNOWNS_ONLY
			-known	Known INDELs from dbSNP
	GATk -HaploTypeCaller	3.3.0	-nct	8
			-D	KNOWN
			-mbq	10
	Samtools-mpileup	1.2	-DSS0G
			-C	50
			-F	0.01
			-vmO	v
	Freebayes		--ploidy	2
			--min-repeat-entropy	1
	Seurat	2.6	--both_strands
			--metrics
			--indels
			--allele-metrics
	MuTect	1.1.4	--cosmic	cosmicVCF
			--dbsnp	dbSNP variants
			--fraction_contamination	0.02
			--minimum_mutation_cell_fraction	0
			--minimum_normal_allele_fraction	0
			--min_qscore	5
			--gap_events_threshold	3
			--heavily_clipped_read_fraction	0.3
			--required_maximum_alt_allele_mapping_quality_score	20
			--max_alt_alleles_in_normal_count	2
			--max_alt_alleles_in_normal_qscore_sum	20
			--max_alt_alleles_in_normal_fraction	0.03
	Picard - MultiMetrics	1.128	PROGRAM	CollectInsertSizeMetrics
			PROGRAM	CollectlignmentSummaryMetrics
			PROGRAM	QualityScoreDistribution
			PROGRAM	MeanQualityByCycle
			ASSUME_SORTED	TRUE
	STAR	2.4	--limitOutSAMoneReadBytes	90000000
			--readFilesCommand	zcat
			--outFilterType	BySJout
			--outFilterMultimapNmax	10
			--outFilterMismatchNmax	10
			--outFilterMismatchNoverLmax	0.1
			--alignIntronMin	20
			--alignIntronMax	1000000
			--alignMatesGapMax	1000000
			--alignSJoverhangMin	8
			--alignSJDBoverhangMin	8
			--seedSearchStartLmax	30
			--chimSegmentMin	15
			--chinJunctionOverhangMin	15
			--runThreadn	14
			--genomeLoad	NoSharedMemory
			--outSAMstrandField	intronMotif
			--outSAmunmapped	Within
			--outSAMmapUnique	255
			--outSAMattrRGline	$Rgtags
			--outSAMmode	Full
	tConut		Default
	delly-0.7.6		-q	20
Amplicon	picardtools	2.10.3
	FastQC	v0.11.5
	EA utils	1.1.2
	samtools - view, index,sort, mpileup	1.2

## Sheet: Supplementary Table 2
Supplementary Table 2. Extended clinical and multiplatform annotation of primary canine lung cancer cases.
		Signalment and history					Histopathological and imaging findings				Treatment				Genetic analyses					Immunohistochemistry
Number	Patient ID	Breed	Sex	Neutered/Spayed	Age at diagnosis (yr)	Clinical finding	Histopathological diagnosis	Anthracosis	Side lung affected	Lung lobe affected		Sample type	Exome sequencing	Amplicon sequencing	Sanger sequencing* (HER2-V659E)	Sanger sequencing (whole HER2)*	Droplet digital PCR* (HER2-V659E)	Plasma droplet digital PCR (ERBB2-V659E)	RNA Expression	HER2
70	CCB010381	Labrador Retriever mix	Female	Yes	10	ND	Adenocarcinoma-Tubulopapillary	Anthracosis	Left	ND	ND	Tumor/Normal	ND	Yes	Yes	ND	ND	ND	Yes	ND
10	CCB040231	Poodle	Female	Yes	13	ND	Adenocarcinoma-Papillary	No	Left	Cranial	Left craiNDl lung lobectomy	Tumor/Normal	ND	Yes	ND	ND	ND	ND	ND	ND
32	CCB050342	Flat-Coated Retriever	Female	Yes	11	Decreased energy level	Adenocarcinoma-Tubulopapillary	No	Right	Caudal dorsal	Right caudal lung lobectomy	Tumor/Normal	ND	Yes	ND	ND	ND	ND	Yes	ND
4	OSU396622	Schnauzer (Miniature)	Male	Yes	12	Incidental	Adenocarcinoma-Papillary	No	Left	Caudal	Left caudal lung lobectomy	Tumor/Normal	Yes	ND	ND	ND	Yes	ND	ND	ND
67	CCB010109	Labrador Retriever	Male	Yes	11	Cough	Adenocarcinoma-Papillary	No	ND	ND	Removal of mass only	Tumor/Normal	ND	Yes	ND	ND	ND	ND	Yes	ND
6	OSU361939	Cocker Spaniel	Female	Yes	13	Cough,shaking, anorexia	Adenocarcinoma-Papillary	No	Left	Cranial	Left crainal lung lobectomy and mediastinal mass removal + 5 FU intracavity chemotherapy followed by carboplatin infusion	Tumor/Normal	ND	Yes	Yes	ND	ND	Yes	Yes	ND
73	CCB030383	Labrador Retriever	Female	Yes	10	Incidental	Adenocarcinoma-Papillary	No	Left	Cranial	Left cranial and caudal lung lobectomies	Tumor/Normal	ND	Yes	ND	ND	ND	ND	ND	ND
58	CCB050097	Schipperke	Female	Yes	12	Cough	Adenocarcinoma-Acinar	No	Left	Caudal	Left caudal lung lobectomy	Tumor/Normal	ND	Yes	ND	ND	ND	ND	ND	ND
26	CCB060156	Great Dane	Male	No	7	ND	Adenocarcinoma-Tubulopapillary	No	Left	Caudal	Left caudal lung lobectomy	Tumor/Normal	ND	Yes	Yes	ND	ND	ND	ND	ND
11	OSU428073	Boston Terrier	Male	Yes	11	Cough	Adenocarcinoma-Papillary	No	Right	Cranial and middle	Right cranial and middle lung lobectomy + carboplatin + vinblastine	Tumor/Normal	ND	Yes	Yes	ND	ND	Yes	Yes	ND
9	CCB050345	Mixed Breed	Female	Yes	11	Seizures	Adenocarcinoma-Papillary	Anthracosis	Right	Caudal	Right caudal lung lobectomy	Tumor/Normal	ND	Yes	ND	ND	ND	ND	ND	ND
39	CCB050350	Norwegian Elkhound	Female	Yes	15	Incidental	Adenocarcinoma-Papillary	No	Right	Cranial	Right cranial lung lobectomy	Tumor/Normal	ND	Yes	ND	ND	ND	ND	Yes	ND
14	OSU388285	Basset Hound	Female	Yes	9	Lethary, pyrexia, cough	Adenocarcinoma-Papillary	No	Right	Caudal and middle	Right middle and caudal lung lobectomies	Tumor/Normal	ND	Yes	Yes	ND	ND	Yes	ND	Yes
56	CCB040245	Mixed Breed	Male	Yes	13	ND	Adenocarcinoma-Papillary	No	ND	ND	Lung lobectomy	Tumor/Normal	ND	Yes	ND	ND	ND	ND	Yes	ND
37	CCB040385	Australian Shepherd	Male	Yes	9	ND	Adenosquamous carcinoma	No	ND	ND	ND	Tumor/Normal	ND	Yes	ND	ND	ND	ND	Yes	ND
17	OSU424354	West Highland White Terrier	Male	Yes	8	Cough, respiratory ffort, no apetite	Adenocarcinoma-Papillary	No	Left	Cranial	Left cranial lung lobectomy	Tumor/Normal	ND	Yes	Yes	ND	ND	ND	Yes	Yes
1	CCB010387	Labrador Retriever	female	Yes	13	ND	Adenocarcinoma-Acinar	Anthracosis	Right	Cranial	Right cranial lung lobectomy	Tumor/Normal	Yes	Yes	ND	ND	ND	ND	Yes	ND
19	OSU389339	Basset Hound	Female	Yes	9	Cough	Adenocarcinoma-Papillary	No	Left	Caudal	Left caudal lung lobectomy	Tumor/Normal	ND	Yes	Yes	ND	ND	Yes	ND	Yes
20	OSUK9PAPADOscar	Schnauzer (Miniature)	Male	Yes	10	Dyspnea	Adenocarcinoma-Papillary	ND	Right	Cranial	Right cranial and caudal lung lobectomies	Cell line	ND	Yes	ND	Yes	Yes	ND	ND	ND
3	CCB050354	Labrador Retriever	Male	No	9	Cough, exercise intolerance	Adenocarcinoma-Papillary	Pneumoconiosis	Right	Middle	Right middle lung lobectomy; vinorelbine: 15 mg/m^2, 14.4 mg intravenously	Tumor/Normal	Yes	Yes	ND	ND	ND	ND	Yes	ND
22	OSUK9PAPADRex	Mixed Breed	Male	Yes	9	Hemoptysis	Adenocarcinoma-Mucinous papillary	ND	Right	Cranial	Right cranial lung lobectomy	Cell line	ND	Yes	ND	Yes	Yes	ND	ND	ND
23	OSU419040	Pomeranian	Female	Yes	13	Wheezing, collapse after exercise	Adenocarcinoma-Papillary	No	Right	Caudal and middle	Left caudal lung lobectomy (partial debulking)+ vinblastine and carboplatin	Tumor/Normal	ND	Yes	ND	ND	Yes	ND	ND	Yes
72	CCB030381	Labrador Retriever	Female	Yes	12	Cough	Adenocarcinoma-Papillary	Anthracosis	Right	Caudal	Right caudal lung lobectomy	Tumor/Normal	ND	Yes	ND	ND	ND	ND	ND	ND
30	CCB060143	Mixed Breed	Male	Yes	11	ND	Adenocarcinoma-Solid	No	Right	ND	Right caudal lung lobectomy	Tumor/Normal	ND	Yes	ND	ND	ND	ND	Yes	ND
21	CCB070294	Mixed Breed	Female	Yes	9	Lethargy	Adenocarcinoma-Papillary	No	Left	Caudal	Left caudal lung lobectomy +torceranib	Tumor/Normal	ND	Yes	ND	ND	Yes	ND	ND	ND
31	CCB050356	Brittany Spaniel	Female	Yes	11	Cough	Adenocarcinoma	No	Left	Caudal	None	Tumor/Normal	ND	Yes	ND	ND	ND	ND	Yes	ND
28	CLAC	Pointer	Male	No	10	ND	Adenocarcinoma	ND	ND	ND	ND	Cell line	ND	Yes	Yes	Yes	ND	ND	ND	ND
29	OSU429271	Wheaten Terrier	Female	Yes	9	Incidental	Adenocarcinoma	No	Left	Cranial	Left cranial lung lobectomy	Tumor/Normal	ND	Yes	Yes	ND	ND	Yes	Yes	ND
59	CCB070214	Mixed Breed	Female	Yes	8	ND	Adenocarcinoma-Acinar	No	Left	Cranial	Left cranial lung lobectomy	Tumor/Normal	ND	Yes	ND	ND	ND	ND	Yes	ND
41	CCB070142	Mixed Breed	Female	Yes	12	ND	Adenocarcinoma-Acinar	Anthracosis	Left	Cranial and Caudal	Left cranial and caudal lung lobectomies, gemcitabine, carboplatin	Tumor/Normal	ND	Yes	ND	ND	ND	ND	ND	ND
64	CCB050081	Weimaramer	Female	Yes	12	Incidental	Adenocarcinoma-Papillary	No	Left	Caudal	Left caudal lung lobectomy	Tumor/Normal	ND	Yes	ND	ND	ND	ND	Yes	ND
33	OSU431895	Lhasa Apso	Female	Yes	13	Cough	Adenocarcinoma-Tubulopapillary	No	Right	Caudal	Right caudal lung lobectomy	Tumor/Normal	Yes	ND	ND	ND	ND	Yes	ND	ND
34	OSUK9PADSnickers	Shih Tzu	Male	Yes	12	Incidental	Adenocarcinoma-Papillary	No	Left	Cranial	Left cranial lung lobectomy	Cell line	ND	Yes	Yes	Yes	ND	ND	ND	ND
47	CCB050363	Boxer	Male	Yes	7	Incidental	Adenocarcinoma-Papillary	Anthracosis	Right	Caudal	Right caudal lung lobectomy	Tumor/Normal	ND	Yes	ND	ND	Yes	ND	Yes	ND
18	CCB020198	Boxer	Male	Yes	8	Collapse, thoracic pain	Adenocarcinoma-Tubulopapillary	ND	Left	Caudal	Left caudal lung lobectomy	Tumor/Normal	ND	Yes	Yes	ND	ND	Yes	Yes	ND
24	CCB040005	Labrador Retriever	Male	Yes	10	ND	Adenocarcinoma-Papillary	No	Left	Caudal	Left caudal lung lobectomy	Tumor/Normal	ND	Yes	Yes	ND	ND	ND	ND	ND
38	OSUK9PADSQ	Mixed Breed	Female	Yes	11	Hemoptysis	Adenosquamous carcinoma	No	Left	Caudal	Left caudal lung lobectomy	Cell line	ND	Yes	Yes	ND	ND	ND	ND	ND
15	CCB050243	Shih Tzu	Female	Yes	8	ND	Adenocarcinoma-Papillary	ND	Left	Caudal	Left caudal lung lobectomy	Tumor/Normal	ND	Yes	Yes	ND	Yes	ND	Yes	ND
40	OSU381645	German Shepherd	Male	Yes	11	Incidental	Adenocarcinoma-Papillary	No	Left	Caudal	Left caudal lung lobectomy	Tumor/Normal	ND	Yes	Yes	ND	ND	ND	Yes	Yes
76	CCB050352	Mixed Breed	Female	Yes	12	ND	Adenocarcinoma-Papillary	Anthracosis	Right	Cranial	Right cranial lung lobectomy	Tumor/Normal	ND	Yes	ND	ND	ND	ND	Yes	ND
42	OSU415281	Mixed Breed	Male	Yes	12	Incidental	Adenocarcinoma-Papillary	No	Left	Cranial	Left cranial lung lobectomy	Tumor/Normal	ND	Yes	Yes	ND	ND	ND	ND	ND
43	OSU422557	Mixed Breed	Male	Yes	14	Weight loss	Adenosquamous carcinoma	No	Right	ND	Right caudal lung lobectomy -euthansia 2 days postop	Tumor/Normal	ND	Yes	Yes	ND	ND	ND	Yes	ND
44	BACA	ND	ND	ND	ND	ND	Adenocarcinoma	ND	ND	ND	ND	Cell line	ND	Yes	Yes	Yes	ND	ND	ND	ND
63	CCB030382	Bichon Frise	Female	Yes	12	Cough	Adenocarcinoma-Papillary	No	Right	Caudal	Right lung lobectomy - all right lung lobes	Tumor/Normal	ND	Yes	ND	ND	ND	ND	Yes	ND
88	CCB070152	Mixed Breed	Male	Yes	10	ND	Squamous cell carcinoma	No	Right	Caudal	Right caudal and accessory lung lobectomies	Tumor/Normal	ND	Yes	ND	ND	ND	ND	ND	ND
75	CCB050346	Mixed Breed	Female	Yes	10	Cough after exercise	Adenocarcinoma-Papillary	No	Left	Caudal	Left caudal lung lobectomy; carboplatin at 10mg/kg	Tumor/Normal	ND	Yes	ND	ND	ND	ND	ND	ND
51	CCB020070	Labrador Retriever	Female	Yes	12	Cough	Adenocarcinoma-Papillary	No	Right	Caudal	Right caudal lung lobectomy	Tumor/Normal	ND	Yes	Yes	ND	ND	ND	Yes	ND
52	CCB050200	Mixed Breed	Male	Yes	10	ND	Adenocarcinoma	No	ND	ND	ND	Tumor/Normal	ND	Yes	ND	ND	ND	ND	Yes	ND
71	CCB020203	Scottish Terrier	Male	Yes	8	Wheezing, cough, dyspnea	Adenocarcinoma-Papillary	No	Left	Caudal	Left caudal lung lobectomy	Tumor/Normal	ND	Yes	Yes	ND	ND	Yes	ND	ND
46	CCB060040	Welsh Corgi, Pembroke	Male	Yes	14	ND	Adenocarcinoma-Papillary	No	ND	ND	Lung lobectomy	Tumor/Normal	ND	Yes	ND	ND	ND	ND	Yes	ND
80	CCB060056	Papillon	Female	Yes	12	ND	Adenosquamous carcinoma	No	Left	Cranial	Left cranial lung lobectomy	Tumor/Normal	ND	Yes	ND	ND	ND	ND	ND	ND
25	CCB040149	Labrador Retriever	Male	Yes	13	ND	Adenocarcinoma-Mucinous papillary	Anthracosis	ND	ND	Lung lobectomy	Tumor/Normal	ND	Yes	ND	ND	ND	ND	Yes	ND
82	CCB010227	Australian Shepherd	Female	Yes	11	Cough	Adenosquamous carcinoma	No	ND	ND	Navelbine and lung lobectomy	Tumor/Normal	ND	Yes	ND	ND	ND	ND	Yes	ND
13	CCB070114	Bichon Frise	Female	Yes	14	ND	Adenocarcinoma-Papillary	Anthracosis	Left	Caudal	Left caudal lung lobectomy	Tumor/Normal	ND	Yes	Yes	ND	ND	ND	ND	ND
27	CCB070295	Mixed Breed	Female	Yes	12	ND	Adenocarcinoma-Mucinous papillary	No	Left	Caudal	Left caudal lung lobectomy	Tumor/Normal	ND	Yes	ND	ND	Yes	ND	Yes	ND
66	CCB060157	Golden Retriever	Male	Yes	9	ND	Adenocarcinoma-Tubulopapillary	No	Right	Cranial	Right cranial lung lobectomy	Tumor/Normal	ND	Yes	ND	ND	ND	ND	ND	ND
57	OSUK9PAPADShplangie	Dachshund	Female	Yes	10	Cough	Adenocarcinoma-Papillary	ND	Right	Caudal	Right caudal lung lobectomy	Cell line	ND	Yes	ND	Yes	Yes	ND	ND	ND
77	CCB070006	Labrador Retriever	Female	Yes	13	ND	Adenocarcinoma-Papillary	No	Right	Caudal and accessory	Right caudal and accessory lung lobectomies	Tumor/Normal	ND	Yes	Yes	ND	ND	ND	ND	ND
81	CCB070296	Bichon Frise	Female	Yes	11	ND	Adenosquamous carcinoma	Anthracosis	Left	Caudal	Left caudal lung lobectomy	Tumor/Normal	ND	Yes	ND	ND	ND	ND	Yes	ND
60	OSUK9PAPADIsabella	Labrador Retriever mix	Female	Yes	6	Incidental	Adenocarcinoma-Papillary	ND	Right	Caudal	Right caudal lung lobectomy	Cell line	ND	Yes	ND	Yes	Yes	ND	ND	ND
61	OSU421496	American Bulldog	Male	No	7	Dyspnea	Adenocarcinoma-Papillary	No	Right	Caudal	Right caudal lung lobectomy + torceranib	Tumor/Normal	ND	Yes	Yes	ND	ND	ND	Yes	Yes
62	OSUK9PADBarkley	Golden Retriever	Male	Yes	13	Cough	Adenocarcinoma-Papillary	ND	Left	Caudal	Left caudal lung lobectomy	Cell line	ND	Yes	ND	Yes	Yes	ND	ND	ND
36	CCB020251	Border Collie	Male	Yes	12	Cough, dyspnea	Adenocarcinoma-Papillary	No	Left	Caudal	Left caudal lung lobectomy	Tumor/Normal	ND	Yes	ND	ND	Yes	ND	Yes	ND
45	CCB040011	Weimaramer	Female	Yes	12	ND	Adenosquamous carcinoma	No	ND	ND	Cytotoxic chemotherapy	Tumor/Normal	ND	Yes	ND	ND	ND	ND	Yes	ND
69	CCB010336	Mixed Breed	Female	Yes	11	ND	Adenocarcinoma-Papillary	No	ND	ND	Vinorelbine	Tumor/Normal	ND	Yes	ND	ND	ND	ND	Yes	ND
49	CCB050348	Rat Terrier	Male	Yes	10	ND	Adenocarcinoma-Acinar	No	Left	Cranial	Left crainal lung lobectomy, radiation	Tumor/Normal	ND	Yes	ND	ND	ND	ND	Yes	ND
35	CCB010105	Shih Tzu	Male	Yes	10	Cough	Adenosquamous carcinoma	No	Left	Cranial	Left lobectomy	Tumor/Normal	ND	Yes	ND	ND	ND	ND	Yes	ND
87	CCB010131	Bichon frise	Female	Yes	11	ND	Squamous cell carcinoma	No	Left	Cranial	Lung lobectomy	Tumor/Normal	ND	Yes	ND	ND	ND	ND	ND	ND
53	CCB010262	Mixed Breed	Male	Yes	11	ND	Adenocarcinoma-Papillary	No	ND	ND	Lung lobectomy	Tumor/Normal	ND	Yes	ND	ND	ND	ND	Yes	ND
85	CCB010379	Keeshound	Male	Yes	13	ND	Adenosquamous carcinoma	No	Right	ND	Right middle lung lobectomy, prednisone	Tumor/Normal	ND	Yes	ND	ND	ND	ND	Yes	ND
8	CCB020051	Schnauzer (Miniature)	Male	Yes	12	Hemoptysis	Adenocarcinoma	No	Left	Caudal	Left caudal lung lobectomy	Tumor/Normal	ND	Yes	Yes	ND	ND	Yes	Yes	ND
48	CCB020245	Labrador Retriever	Male	Yes	11	Incidental	Adenocarcinoma-Solid	No	Right	Caudal	Right caudal lung lobectomy	Tumor/Normal	ND	Yes	Yes	ND	ND	Yes	Yes	ND
50	CCB020293	Cocker Spaniel	Male	Yes	9	Incidental, painful abdomen	Adenocarcinoma-Tubulopapillary	No	Right	Caudal	Right caudal lung lobectomy	Tumor/Normal	ND	Yes	Yes	ND	ND	Yes	Yes	Yes
7	CCB040068	Samoyed	Male	Yes	11	ND	Adenocarcinoma-Papillary	No	Left	ND	None	Tumor/Normal	ND	Yes	ND	ND	ND	ND	ND	ND
74	CCB050181	Mixed Breed	Female	Yes	11	ND	Adenocarcinoma-Solid	Anthracosis	Right	Middle	Right middle lung lobectomy	Tumor/Normal	ND	Yes	ND	ND	ND	ND	Yes	ND
16	CCB050260	Doberman Pinsher	Female	Yes	11	Dyspnea	Adenocarcinoma-Papillary	No	Right	Caudal	Right caudal lung lobectomy	Tumor/Normal	ND	Yes	Yes	ND	Yes	ND	Yes	ND
84	CCB050349	Mixed Breed	Female	Yes	9	Cough	Adenosquamous carcinoma	No	Right	Caudal	Right caudal lung lobectomy	Tumor/Normal	ND	Yes	ND	ND	ND	ND	Yes	ND
78	OSU454408	Boston Terrier	Female	Yes	8	Incidental	Adenocarcinoma-Tubulopapillary	No	Right	Middle	Right middle lung lobectomy + vinorelbine 8 treatments q. 2 wks	Tumor/Normal	ND	Yes	Yes	ND	ND	ND	ND	Yes
79	OSU452418	Mixed Breed	Male	Yes	10	Cough, restless, panting	Adenocarcinoma-Papillary	No	Left	Caudal	Left caudal lung lobectomy	Tumor/Normal	ND	Yes	ND	ND	ND	ND	Yes	ND
55	CCB070169	English Cocker Spaniel	Male	Yes	8	ND	Adenocarcinoma-Acinar	Anthracosis	Right	ND	Lung lobectomy	Tumor/Normal	ND	Yes	ND	ND	ND	ND	Yes	ND
12	CCB050362	Mixed Breed	Male	Yes	11	Hemoptysis	Adenocarcinoma-Papillary	Anthracosis	Right	Caudal	Right caudal and accessory lung lobectomies, vinorelbine #1 15mg/m^2 = 14mg IV	Tumor/Normal	ND	Yes	Yes	ND	ND	ND	Yes	ND
83	CCB010196	Labrador Retriever	Female	Yes	8	ND	Adenosquamous carcinoma	No	Right	Caudal	Vinorelbine and Right caudal lung lobectomy	Tumor/Normal	ND	Yes	ND	ND	ND	ND	ND	ND
68	CCB010139	Labrador Retriever	Male	No	8	Lame	Adenocarcinoma-Acinar	No	Right	ND	Lomustine, CCNU, iron dextron 100mg/ml, maropitant 10mg, packed red blood cells (2 units), omeprazole 20mg, famotidine 10mg/ml, amldipine 2.5mg tabs, benazepril 20mg tabs	Tumor/Normal	ND	Yes	ND	ND	ND	ND	Yes	ND
2	CCB050227	Labrador Retriever	Female	Yes	11	Cough	Adenocarcinoma-Papillary	Anthracosis	Left	Caudal	Left caudal lung lobectomy	Tumor/Normal	Yes	ND	ND	ND	Yes	ND	ND	ND
65	CCB010358	Greyhound	Female	Yes	12	Dyspnea	Adenocarcinoma-Papillary	Anthracosis	Right	Cranial	Right cranial lung lobectomy	Tumor/Normal	ND	Yes	ND	ND	ND	ND	Yes	ND
86	OSULSCC1	Labrador Retriever	Female	Yes	10	Cough	Squamous cell carcinoma	ND	Right	Caudal	Right caudal lung lobectomy	Cell line	ND	Yes	Yes	Yes	ND	ND	ND	ND
5	CCB010120	Labrador Retriever	Male	Yes	9	ND	Adenocarcinoma-Papillary	No	Left	Caudal dorsal	Lung lobectomy	Tumor/Normal	ND	Yes	Yes	ND	ND	ND	Yes	ND
54	CCB050353	Bichon Frise	Female	Yes	8	Cough	Adenocarcinoma-Papillary	Anthracosis	Right	Cranial	Right cranial lung lobectomy	Tumor/Normal	ND	Yes	ND	ND	ND	ND	ND	ND
89	OSUK9PAPADRiley	Labrador Retriever	Female	Yes	11	Cough	Adenocarcinoma-Mucinous papillary	No	Right	Cranial	Right cranial lung lobectomy	Cell line	ND	ND	Yes	Riley	ND	ND	ND	ND
	* Only tumor data
	ND= no data

## Sheet: Supplementary Table 3
Supplementary Table 3 : Sequencing metrics for primary canine lung cancer exome analysis.
Metrics	Normal	Tumor
Total number of reads	1074194664	1185003340
Average number of reads (range)	214,838,933 (162,303,724-255,845,742)	237,000,668 (217,580,754-245,842,622)
% of PF reads	1	1
Mean % of PF reads aligned (range)	99.79% (99.78-99.80%)	99.18% (96.68-99.815)
Mean target coverage (range)	263.5 (204.11-313.46)	298.79 (274.02-311.19)
% of bases at 40X	98.54 (97.92-98.97%)	98.66% (98.23-98.84%)
Metrics obtained from picardtools
PF = passing filter

## Sheet: Supplementary Table 4
Supplementary Table 4. Somatic coding SNVs identified by exome sequencing of primary canine lung cancers.
Patient ID	Gene symbol	Transcript accession	Nucleotide (genomic)	rs ID (dbSNP151)	Nucleotide (cDNA)	Amino acid (protein)	Mutation type	% mutant reads
CCB010387	ENSCAFG00000024198	ENSCAFT00000048483.2	chr1:103124016A>G	.	c.547A>G	p.Asn183Asp	Missense variant	0.125
CCB010387	ENSCAFG00000031824	ENSCAFT00000044443.1	chr1:110344193G>A	.	c.746G>A	p.Arg249His	Missense variant	0.577778
CCB010387	ENSCAFG00000001785	ENSCAFT00000002802.3	chr10:31022318G>A	.	c.529G>A	p.Asp177Asn	Missense variant	0.210526
CCB010387	KCNK12	ENSCAFT00000046978.1	chr10:49671039G>T	.	c.349C>A	p.Pro117Thr	Missense variant	0.166667
CCB010387	KDR	ENSCAFT00000003300.3	chr13:47443084C>T	.	c.3846-1G>A	.	Splice acceptor variant	0.41453
CCB010387	TMPRSS11F	ENSCAFT00000004486.3	chr13:58569540G>T	.	c.128C>A	p.Thr43Asn	Missense variant	0.146853
CCB010387	HGF	ENSCAFT00000010288.3	chr18:21342802AC>A	.	c.1616+1delG	.	Splice donor variant	0.338583
CCB010387	ENSCAFG00000024737	ENSCAFT00000023283.3	chr19:51478247A>C	.	c.1055T>G	p.Leu352Arg	Missense variant	0.227528
CCB010387	ENSCAFG00000030414	ENSCAFT00000046090.1	chr22:59203429G>A	.	c.728C>T	p.Thr243Ile	Missense variant	0.108411
CCB010387	ARPP21	ENSCAFT00000007650.4	chr23:5811527C>A	.	c.1354+8C>A	.	Splice region variant	0.253012
CCB010387	PRKG1	ENSCAFT00000044295.2	chr26:35767262C>T	.	c.812G>A	p.Arg271Gln	Missense variant	0.151515
CCB010387	ACTA2	ENSCAFT00000024881.3	chr26:38707206G>A	.	c.289C>T	p.Arg97Cys	Missense variant	0.379061
CCB010387	UNC13C	ENSCAFT00000025186.3	chr30:19556056A>T	.	c.607A>T	p.Met203Leu	Missense variant	0.369565
CCB010387	ISLR	ENSCAFT00000028352.3	chr30:37328596G>A	.	c.1447G>A	p.Val483Ile	Missense variant	0.300813
CCB010387	HLCS	ENSCAFT00000015393.3	chr31:31943202C>T	.	c.1682G>A	p.Ser561Asn	Missense variant	0.34464
CCB010387	ENSCAFG00000032143	ENSCAFT00000046842.1	chr33:5301141T>A	.	c.794T>A	p.Val265Asp	Missense variant	0.4
CCB010387	PHLDB1	ENSCAFT00000019942.4	chr5:15101566G>A	.	c.3517C>T	p.Arg1173Trp	Missense variant	0.5
CCB010387	IQCE	ENSCAFT00000036666.3	chr6:14540101C>T	.	c.217-3C>T	.	Splice region variant	0.0592593
CCB010387	ENSCAFG00000016634	ENSCAFT00000026354.3	chr6:17505745C>G	.	c.583G>C	p.Asp195His	Missense variant	0.08
CCB010387	USP33	ENSCAFT00000032445.3	chr6:69155680G>T	.	c.1509G>T	p.Glu503Asp	Missense variant	0.542601
CCB010387	MIS18BP1	ENSCAFT00000022361.4	chr8:22647430A>C	.	c.2037T>G	p.Cys679Trp	Missense variant	0.127536
CCB010387	ERBB2	ENSCAFT00000025936.3	chr9:22765127A>T	.	c.1976T>A	p.Val659Glu	Missense variant	0.439462
CCB010387	SLC43A2	ENSCAFT00000030472.2	chr9:45767181C>A	.	c.202G>T	p.Glu68*	Stop-gained variant	0.0825688
CCB010387	ENSCAFG00000019755	ENSCAFT00000031414.3	chr9:49689729T>G	.	c.374A>C	p.Tyr125Ser	Missense variant	0.271739
CCB010387	ACE2	ENSCAFT00000019262.3	chrX:11818516G>T	.	c.1034C>A	p.Pro345His	Missense variant	0.286064
CCB010387	TNMD	ENSCAFT00000027750.3	chrX:74474211T>C	.	c.622T>C	p.Phe208Leu	Missense variant	0.277778
CCB050227	SYNE1	ENSCAFT00000000760.4	chr1:42441824C>G	.	c.23289G>C	p.Leu7763Phe	Missense variant	0.102273
CCB050227	FREM1	ENSCAFT00000002397.3	chr11:35220245G>C	.	c.4600C>G	p.Leu1534Val	Missense variant	0.696
CCB050227	COL14A1	ENSCAFT00000001452.3	chr13:19125873G>A	.	c.2302G>A	p.Val768Met	Missense variant	0.371681
CCB050227	MPP6	ENSCAFT00000004508.3	chr14:38182881A>C	.	c.1042A>C	p.Lys348Gln	Missense variant	0.481928
CCB050227	ZNF800	ENSCAFT00000002714.3	chr14:8880781C>A	.	c.158-7C>A	.	Splice region variant	0.225
CCB050227	PABPC4	ENSCAFT00000004949.4	chr15:3292275C>A	.	c.407C>A	p.Ser136Tyr	Missense variant	0.391827
CCB050227	GIMAP8	ENSCAFT00000007370.2	chr16:14757724G>C	.	c.638G>C	p.Ser213Thr	Missense variant	0.0495868
CCB050227	CSMD1	ENSCAFT00000013889.4	chr16:55503451C>A	.	c.1307G>T	p.Arg436Ile	Missense variant	0.416268
CCB050227	MFSD2B	ENSCAFT00000006341.3	chr17:18504848G>A	.	c.1249G>A	p.Ala417Thr	Missense variant	0.348361
CCB050227	PCLO	ENSCAFT00000010157.3	chr18:22512128C>T	.	c.9742G>A	p.Ala3248Thr	Missense variant	0.378689
CCB050227	OR4P4	ENSCAFT00000012973.3	chr18:40239473C>A	.	c.802G>T	p.Val268Leu	Missense variant	0.386525
CCB050227	SART1	ENSCAFT00000020806.3	chr18:51299884G>A	.	c.1741C>T	p.Arg581Trp	Missense variant	0.514056
CCB050227	CAPN1	ENSCAFT00000021965.3	chr18:52006009T>TA	.	c.942_943insT	p.Asn315fs	Frameshift variant	0.3
CCB050227	MBD5	ENSCAFT00000008917.3	chr19:50235818G>A	.	c.4331G>A	p.Ser1444Asn	Missense variant	0.386667
CCB050227	PTAFR	ENSCAFT00000018894.3	chr2:72255041G>A	.	c.673G>A	p.Ala225Thr	Missense variant	0.203931
CCB050227	EEFSEC	ENSCAFT00000006626.3	chr20:2273718C>T	.	c.1073C>T	p.Ser358Phe	Missense variant	0.681592
CCB050227	FANCD2	ENSCAFT00000008366.3	chr20:8253085C>T	.	c.3274G>A	p.Glu1092Lys	Missense variant	0.75817
CCB050227	ENSCAFG00000005230	ENSCAFT00000008452.3	chr21:22004023G>A	.	c.1532G>A	p.Arg511Gln	Missense variant	0.450311
CCB050227	OR51G2	ENSCAFT00000019954.3	chr21:27360444C>T	.	c.883G>A	p.Val295Ile	Missense variant	0.32526
CCB050227	ENSCAFG00000006321	ENSCAFT00000010223.3	chr21:28981291G>T	.	c.852G>T	p.Leu284Phe	Missense variant	0.0849754
CCB050227	MBNL2	ENSCAFT00000008902.3	chr22:47695351C>A	.	c.844C>A	p.Gln282Lys	Missense variant	0.430556
CCB050227	FBXO25	ENSCAFT00000016193.2	chr25:37451577C>T	.	c.235C>T	p.Gln79*	Stop-gained variant	0.69
CCB050227	ADAMTSL3	ENSCAFT00000021096.3	chr3:55577631G>A	.	c.1849G>A	p.Glu617Lys	Missense variant	0.327731
CCB050227	IRX4	ENSCAFT00000016576.3	chr34:10928900G>C	.	c.685G>C	p.Glu229Gln	Missense variant	0.440789
CCB050227	CNTN2	ENSCAFT00000037921.2	chr38:1585482G>A	.	c.1081G>A	p.Glu361Lys	Missense variant	0.408511
CCB050227	NIPBL	ENSCAFT00000044310.2	chr4:71598459T>C	.	c.6682A>G	p.Ile2228Val	Missense variant	0.477612
CCB050227	DNAH2	ENSCAFT00000026606.3	chr5:32634372C>A	.	c.2918C>A	p.Ser973Tyr	Missense variant	0.661157
CCB050227	MYH13	ENSCAFT00000027662.3	chr5:34638774G>A	.	c.2891C>T	p.Thr964Met	Missense variant	0.125
CCB050227	ZSWIM7	ENSCAFT00000028717.3	chr5:39868255G>C	.	c.48G>C	p.Glu16Asp	Missense variant	0.736842
CCB050227	ENSCAFG00000014044	ENSCAFT00000022201.3	chr6:8811223G>C	.	c.7728C>G	p.Ser2576Arg	Missense variant	0.0563798
CCB050227	MYBPH	ENSCAFT00000016341.3	chr7:41692G>A	.	c.1003G>A	p.Gly335Arg	Missense variant	0.241711
CCB050227	NLRP3	ENSCAFT00000017002.3	chr8:259283G>T	.	c.1687G>T	p.Glu563*	Stop-gained variant	0.304493
CCB050227	ERBB2	ENSCAFT00000025936.3	chr9:22765127A>T	.	c.1976T>A	p.Val659Glu	Missense variant	0.541667
CCB050227	CACNA1G	ENSCAFT00000027129.5	chr9:26518243G>A	.	c.3268G>A	p.Ala1090Thr	Missense variant	0.0704225
CCB050227	ENTPD2	ENSCAFT00000031028.1	chr9:48590996G>A	.	c.133G>A	p.Asp45Asn	Missense variant	0.259804
CCB050227	SLITRK2	ENSCAFT00000030252.3	chrX:114581830T>C	.	c.761T>C	p.Val254Ala	Missense variant	0.383929
CCB050227	CITED1	ENSCAFT00000027168.3	chrX:56327283G>T	.	c.565C>A	p.Leu189Met	Missense variant	0.42623
CCB050227	DIAPH2	ENSCAFT00000035655.2	chrX:71042970A>C	.	c.3308A>C	p.Lys1103Thr	Missense variant	0.0786026
CCB050354	ENSCAFG00000026536	ENSCAFT00000001265.3	chr1:54190681C>T	.	c.539G>A	p.Arg180His	Missense variant	0.221239
CCB050354	ENSCAFG00000001339	ENSCAFT00000002078.3	chr1:73521101C>A	.	c.66+4C>A	.	Splice region variant	0.175966
CCB050354	MICALL1	ENSCAFT00000002244.4	chr10:26728936C>A	.	c.926+1G>T	.	Splice donor variant	0.490991
CCB050354	ENSCAFG00000005307	ENSCAFT00000029311.2	chr10:38390829C>A	.	c.263C>A	p.Ala88Asp	Missense variant	0.123077
CCB050354	ENSCAFG00000001853	ENSCAFT00000002921.4	chr12:11905302C>A	.	c.1825C>A	p.Pro609Thr	Missense variant	0.165698
CCB050354	CSMD3	ENSCAFT00000001238.4	chr13:12453036C>A	.	c.9200G>T	p.Arg3067Ile	Missense variant	0.404372
CCB050354	WDR35	ENSCAFT00000006134.4	chr17:15030766C>A	.	c.255G>T	p.Lys85Asn	Missense variant	0.138833
CCB050354	APOB	ENSCAFT00000006266.2	chr17:15888008G>A	.	c.4987C>T	p.Arg1663Cys	Missense variant	0.378251
CCB050354	MAML3	ENSCAFT00000005950.3	chr19:2891218T>G	.	c.108T>G	p.Phe36Leu	Missense variant	0.187067
CCB050354	ATP9A	ENSCAFT00000018585.3	chr24:37804580A>G	.	c.2732T>C	p.Leu911Pro	Missense variant	0.199203
CCB050354	SLC8B1	ENSCAFT00000046446.2	chr26:10679000C>G	.	c.568G>C	p.Ala190Pro	Missense variant	0.179348
CCB050354	LCOR	ENSCAFT00000048723.1	chr28:10333164A>G	.	c.1801A>G	p.Thr601Ala	Missense variant	0.22108
CCB050354	POLK	ENSCAFT00000014935.3	chr3:30811008C>A	.	c.1083+1G>T	.	Splice donor variant	0.238095
CCB050354	PDE6B	ENSCAFT00000026577.3	chr3:91751745A>C	.	c.1786T>G	p.Cys596Gly	Missense variant	0.10828
CCB050354	ENSCAFG00000024680	ENSCAFT00000038074.3	chr30:31947438C>G	.	c.911C>G	p.Ser304Cys	Missense variant	0.185345
CCB050354	ZSCAN12	ENSCAFT00000018931.3	chr35:25530627C>A	.	c.421G>T	p.Val141Phe	Missense variant	0.172414
CCB050354	ERBB4	ENSCAFT00000022535.3	chr37:19041081C>T	.	c.3007-8G>A	.	Splice region variant	0.128205
CCB050354	ENSCAFG00000016100	ENSCAFT00000048260.1	chr4:34757216C>T	.	c.1082G>A	p.Gly361Asp	Missense variant	0.138889
CCB050354	CALB2	ENSCAFT00000037364.2	chr5:77189552C>A	.	c.56C>A	p.Ala19Asp	Missense variant	0.209302
CCB050354	RNPEP	ENSCAFT00000016772.3	chr7:970490A>AG	.	c.1239dupC	p.Tyr414fs	Frameshift variant	0.21327
CCB050354	ERBB2	ENSCAFT00000025936.3	chr9:22765077T>C	.	c.2026A>G	p.Lys676Glu	Missense variant	0.347619
CCB050354	CALCOCO2	ENSCAFT00000026722.3	chr9:25058008C>T	.	c.154C>T	p.Arg52*	Stop-gained variant	0.225389
CCB050354	UNC45B	ENSCAFT00000029046.3	chr9:38190461C>G	.	c.2653G>C	p.Val885Leu	Missense variant	0.169444
CCB050354	COL5A1	ENSCAFT00000031582.4	chr9:50832901G>C	.	c.4007G>C	p.Gly1336Ala	Missense variant	0.323077
CCB050354	CERCAM	ENSCAFT00000031918.3	chr9:55110594G>A	.	c.1717C>T	p.Arg573Cys	Missense variant	0.19209
CCB050354	AFF2	ENSCAFT00000030321.3	chrX:117131625C>T	.	c.2065C>T	p.Pro689Ser	Missense variant	0.234973
CCB050354	ARSH	ENSCAFT00000017754.3	chrX:1579713A>G	.	c.961A>G	p.Thr321Ala	Missense variant	0.231405
OSU396622	GLIPR1L2	ENSCAFT00000048594.1	chr10:15924621G>T	.	c.109G>T	p.Gly37Trp	Missense variant	0.264706
OSU396622	PNPLA1	ENSCAFT00000002155.3	chr12:5417391C>T	.	c.1448C>T	p.Pro483Leu	Missense variant	0.173077
OSU396622	POU3F2	ENSCAFT00000043152.1	chr12:57104161A>C	.	c.77A>C	p.Gln26Pro	Missense variant	0.077381
OSU396622	MDR1	ENSCAFT00000002896.3	chr14:13711741G>T	.	c.422C>A	p.Ala141Glu	Missense variant	0.223776
OSU396622	TLL1	ENSCAFT00000014157.3	chr15:61887057G>T	.	c.1337G>T	p.Trp446Leu	Missense variant	0.0669546
OSU396622	CSMD2	ENSCAFT00000005882.4	chr15:8006138C>T	.	c.1756+8C>T	.	Splice region variant	0.143939
OSU396622	SGCZ	ENSCAFT00000010944.3	chr16:37644479A>G	.	c.277T>C	p.Tyr93His	Missense variant	0.0637755
OSU396622	SLC7A2	ENSCAFT00000011153.3	chr16:40855325C>T	.	c.20C>T	p.Ala7Val	Missense variant	0.239252
OSU396622	AIM1L	ENSCAFT00000019865.4	chr2:73687064G>A	.	c.3371G>A	p.Gly1124Glu	Missense variant	0.187861
OSU396622	ENSCAFG00000005282	ENSCAFT00000008518.3	chr22:36070777G>A	.	c.1185G>A	p.Ser395Ser	Splice region variant	0.213313
OSU396622	MYO16	ENSCAFT00000009790.3	chr22:57655454G>T	.	c.3277G>T	p.Val1093Leu	Missense variant	0.232742
OSU396622	ENSCAFG00000018047	ENSCAFT00000028683.4	chr30:38467600C>T	.	c.2318C>T	p.Thr773Met	Missense variant	0.267857
OSU396622	NRSN1	ENSCAFT00000048012.1	chr35:22235946G>A	.	c.298G>A	p.Asp100Asn	Missense variant	0.268398
OSU396622	CFLAR	ENSCAFT00000019278.2	chr37:10304878TG>T	.	c.1021delG	p.Asp341fs	Frameshift variant	0.275049
OSU396622	CFLAR	ENSCAFT00000019278.2	chr37:10304880G>T	.	c.1021G>T	p.Asp341Tyr	Missense variant	0.257353
OSU396622	NBEAL1	ENSCAFT00000020215.4	chr37:11989639C>A	.	c.4376C>A	p.Ser1459Tyr	Missense variant	0.301587
OSU396622	SUSD4	ENSCAFT00000018068.3	chr38:23671827G>A	.	c.218G>A	p.Arg73His	Missense variant	0.204819
OSU396622	PER1	ENSCAFT00000026906.4	chr5:32962533C>T	.	c.2062G>A	p.Glu688Lys	Missense variant	0.243902
OSU396622	FBXL18	ENSCAFT00000025425.3	chr6:12448719G>A	.	c.1096G>A	p.Glu366Lys	Missense variant	0.204239
OSU396622	CACNA1E	ENSCAFT00000020724.5	chr7:15200535C>T	.	c.3218C>T	p.Thr1073Met	Missense variant	0.195699
OSU396622	KIF21B	ENSCAFT00000017574.3	chr7:2206062G>T	.	c.1467-4G>T	.	Splice region variant	0.2
OSU396622	MBD1	ENSCAFT00000030047.3	chr7:78605634G>C	.	c.1684G>C	p.Val562Leu	Missense variant	0.156566
OSU396622	KCNK10	ENSCAFT00000043710.2	chr8:59487970C>T	.	c.940G>A	p.Val314Ile	Missense variant	0.205479
OSU396622	KIF26A	ENSCAFT00000029108.4	chr8:71824126G>A	.	c.4085G>A	p.Arg1362Gln	Missense variant	0.273684
OSU396622	ERBB2	ENSCAFT00000025936.3	chr9:22765127A>T	.	c.1976T>A	p.Val659Glu	Missense variant	0.195402
OSU431895	TSEN34	ENSCAFT00000004233.3	chr1:103021904C>A	.	c.864G>T	p.Lys288Asn	Missense variant	0.339869
OSU431895	ENSCAFG00000002834	ENSCAFT00000004536.3	chr1:105568333G>A	.	c.473G>A	p.Arg158His	Missense variant	0.36858
OSU431895	PPM1N	ENSCAFT00000007128.3	chr1:110068586G>C	.	c.1140-6C>G	.	Splice region variant	0.29661
OSU431895	CLPTM1	ENSCAFT00000007423.3	chr1:110493865AG>A	.	c.73-6delC	.	Splice region variant	0.141509
OSU431895	CCDC97	ENSCAFT00000008063.4	chr1:112653365G>T	.	c.712C>A	p.Gln238Lys	Missense variant	0.270833
OSU431895	PAK4	ENSCAFT00000009039.4	chr1:114014367G>A	.	c.860C>T	p.Pro287Leu	Missense variant	0.356164
OSU431895	ZFP82	ENSCAFT00000045420.1	chr1:116038973A>T	.	c.332T>A	p.Leu111*	Stop-gained variant	0.294326
OSU431895	URI1	ENSCAFT00000012164.4	chr1:121611868G>C	.	c.28C>G	p.Leu10Val	Missense variant	0.272727
OSU431895	BCLAF1	ENSCAFT00000000383.4	chr1:28873817G>C	.	c.38C>G	p.Ser13*	Stop-gained variant	0.0523691
OSU431895	SERAC1	ENSCAFT00000000999.3	chr1:47609753C>A	.	c.1117G>T	p.Glu373*	Stop-gained variant	0.226337
OSU431895	LAMA2	ENSCAFT00000001697.4	chr1:67645594G>T	.	c.141G>T	p.Arg47Ser	Missense variant	0.102837
OSU431895	CD274	ENSCAFT00000003346.3	chr1:93590856G>C	.	c.314G>C	p.Arg105Thr	Missense variant	0.240741
OSU431895	ERMP1	ENSCAFT00000003361.3	chr1:93880291C>T	.	c.628G>A	p.Asp210Asn	Missense variant	0.299559
OSU431895	PTPRB	ENSCAFT00000000719.4	chr10:12302391G>A	.	c.4715-7C>T	.	Splice region variant	0.20614
OSU431895	ZFC3H1	ENSCAFT00000000728.4	chr10:13201668C>G	.	c.1061G>C	p.Arg354Thr	Missense variant	0.229111
OSU431895	TBC1D15	ENSCAFT00000000735.3	chr10:13382797C>G	.	c.206C>G	p.Ser69Cys	Missense variant	0.235294
OSU431895	TTLL12	ENSCAFT00000001412.3	chr10:22383057G>C	.	c.1699G>C	p.Asp567His	Missense variant	0.209375
OSU431895	CHADL	ENSCAFT00000001705.3	chr10:23998212C>A	.	c.2195C>A	p.Ser732Tyr	Missense variant	0.273973
OSU431895	SEPT10	ENSCAFT00000047214.1	chr10:34297349C>T	.	c.991C>T	p.Gln331*	Stop-gained variant	0.227545
OSU431895	SLC16A7	ENSCAFT00000000487.3	chr10:3491155G>C	.	c.678G>C	p.Lys226Asn	Missense variant	0.217593
OSU431895	EPCAM	ENSCAFT00000004180.3	chr10:49493762C>G	.	c.731C>G	p.Pro244Arg	Missense variant	0.211009
OSU431895	FOXN2	ENSCAFT00000046196.1	chr10:50260429C>G	.	c.476C>G	p.Ser159Cys	Missense variant	0.127036
OSU431895	SPTBN1	ENSCAFT00000004367.4	chr10:55558060C>T	.	c.6301C>T	p.Pro2101Ser	Missense variant	0.206349
OSU431895	TEX43	ENSCAFT00000000911.2	chr11:15908369G>C	.	c.300G>C	p.Leu100Phe	Missense variant	0.274854
OSU431895	SPAG8	ENSCAFT00000044181.2	chr11:52340730C>T	.	c.691G>A	p.Glu231Lys	Missense variant	0.256705
OSU431895	DDX39B	ENSCAFT00000036511.2	chr12:1042882G>A	.	c.113C>T	p.Ser38Phe	Missense variant	0.22807
OSU431895	TAP1	ENSCAFT00000001306.3	chr12:2431980C>A	.	c.89G>T	p.Arg30Met	Missense variant	0.283019
OSU431895	TAP1	ENSCAFT00000001306.3	chr12:2431981T>A	.	c.88A>T	p.Arg30Trp	Missense variant	0.3
OSU431895	COL19A1	ENSCAFT00000004046.4	chr12:32509880G>C	.	c.915G>C	p.Gln305His	Missense variant	0.231527
OSU431895	NRM	ENSCAFT00000000694.5	chr12:482875C>A	.	c.2296G>T	p.Asp766Tyr	Missense variant	0.134409
OSU431895	NRM	ENSCAFT00000000694.5	chr12:482885G>C	.	c.2286C>G	p.Asp762Glu	Missense variant	0.103825
OSU431895	MDN1	ENSCAFT00000048198.2	chr12:48983311A>G	.	c.1892T>C	p.Val631Ala	Missense variant	0.307888
OSU431895	SLC45A4	ENSCAFT00000001916.3	chr13:35744576G>A	.	c.61C>T	p.Gln21*	Stop-gained variant	0.192878
OSU431895	CPSF1	ENSCAFT00000002514.3	chr13:37818701C>T	.	c.3484G>A	p.Asp1162Asn	Missense variant	0.201031
OSU431895	KIT	ENSCAFT00000049830.2	chr13:47179167G>C	.	c.1929G>C	p.Leu643Phe	Missense variant	0.153061
OSU431895	ZFPM2	ENSCAFT00000001049.4	chr13:6435763T>A	.	c.181T>A	p.Cys61Ser	Missense variant	0.181818
OSU431895	FAM126A	ENSCAFT00000004353.3	chr14:36657833C>T	.	c.160G>A	p.Glu54Lys	Missense variant	0.24
OSU431895	GPNMB	ENSCAFT00000004389.2	chr14:36933881G>A	.	c.682G>A	p.Val228Met	Missense variant	0.182143
OSU431895	ENSCAFG00000002897	ENSCAFT00000004632.3	chr14:39514372G>C	.	c.167+5G>C	.	Splice region variant	0.158915
OSU431895	ANLN	ENSCAFT00000005209.3	chr14:47818863G>T	.	c.790G>T	p.Asp264Tyr	Missense variant	0.244
OSU431895	ENSCAFG00000023485	ENSCAFT00000036128.2	chr14:58969628G>C	.	c.518G>C	p.Arg173Thr	Missense variant	0.243697
OSU431895	CPA1	ENSCAFT00000002313.3	chr14:6565478G>C	.	c.815C>G	p.Ser272*	Stop-gained variant	0.0734463
OSU431895	ENSCAFG00000028806	ENSCAFT00000046383.1	chr15:14094033G>A	.	c.662C>T	p.Ser221Phe	Missense variant	0.066092
OSU431895	PPIE	ENSCAFT00000046678.1	chr15:3169583C>G	.	c.174+5G>C	.	Splice region variant	0.181452
OSU431895	MMAA	ENSCAFT00000012297.2	chr15:44232274G>A	.	c.229G>A	p.Glu77Lys	Missense variant	0.171681
OSU431895	AGBL3	ENSCAFT00000005114.3	chr16:13061855C>G	.	c.1122G>C	p.Met374Ile	Missense variant	0.257075
OSU431895	ENSCAFG00000003149	ENSCAFT00000005066.3	chr16:13821050C>T	.	c.845C>T	p.Ser282Phe	Missense variant	0.204868
OSU431895	KRBA1	ENSCAFT00000045150.2	chr16:14495233G>C	.	c.121G>C	p.Glu41Gln	Missense variant	0.233503
OSU431895	WDR60	ENSCAFT00000008456.3	chr16:20823434G>C	.	c.826G>C	p.Glu276Gln	Missense variant	0.19697
OSU431895	ENSCAFG00000028458	ENSCAFT00000042745.1	chr16:35373460G>A	.	c.602G>A	p.Gly201Glu	Missense variant	0.0886076
OSU431895	LONRF1	ENSCAFT00000047804.1	chr16:36244321C>G	.	c.859G>C	p.Asp287His	Missense variant	0.188841
OSU431895	ENSCAFG00000006873	ENSCAFT00000011052.3	chr16:40524050G>C	.	c.333G>C	p.Leu111Phe	Missense variant	0.197635
OSU431895	ENSCAFG00000008367	ENSCAFT00000013291.3	chr16:51552737G>T	.	c.1400G>T	p.Arg467Leu	Missense variant	0.217742
OSU431895	APOB	ENSCAFT00000006266.2	chr17:15886395G>C	.	c.6600C>G	p.Ile2200Met	Missense variant	0.283146
OSU431895	TSSC1	ENSCAFT00000005219.3	chr17:1870470C>T	.	c.990-1G>A	.	Splice acceptor variant	0.197183
OSU431895	DPYSL5	ENSCAFT00000007378.3	chr17:20895379C>A	.	c.246C>A	p.Phe82Leu	Missense variant	0.262537
OSU431895	PLB1	ENSCAFT00000008431.3	chr17:22547880G>A	.	c.3822G>A	p.Gln1274Gln	Splice region variant	0.24359
OSU431895	C2orf71	ENSCAFT00000036452.3	chr17:22907687C>G	.	c.2851G>C	p.Asp951His	Missense variant	0.186335
OSU431895	CEBPZ	ENSCAFT00000009851.3	chr17:29570374C>T	.	c.2515G>A	p.Glu839Lys	Missense variant	0.226368
OSU431895	NOTCH2	ENSCAFT00000016889.3	chr17:56870205C>T	.	c.5137G>A	p.Glu1713Lys	Missense variant	0.261745
OSU431895	TXNIP	ENSCAFT00000018124.3	chr17:58777650G>C	.	c.811C>G	p.Arg271Gly	Missense variant	0.294118
OSU431895	ZNF687	ENSCAFT00000020030.3	chr17:60356209G>C	.	c.2200G>C	p.Glu734Gln	Missense variant	0.210526
OSU431895	DTX4	ENSCAFT00000012238.3	chr18:37562136G>A	.	c.739C>T	p.Arg247Trp	Missense variant	0.316038
OSU431895	ENSCAFG00000025503	ENSCAFT00000039659.2	chr18:38128118G>A	.	c.787G>A	p.Val263Ile	Missense variant	0.305006
OSU431895	ENSCAFG00000031163	ENSCAFT00000047375.1	chr18:39799057C>T	.	c.361G>A	p.Asp121Asn	Missense variant	0.241667
OSU431895	TRPM5	ENSCAFT00000016218.3	chr18:46485577C>A	.	c.1806G>T	p.Arg602Ser	Missense variant	0.316583
OSU431895	ENSCAFG00000032485	ENSCAFT00000046317.1	chr18:51424509C>T	.	c.614C>T	p.Ser205Leu	Missense variant	0.148148
OSU431895	AHNAK	ENSCAFT00000048755.1	chr18:54101249G>T	.	c.2726G>T	p.Gly909Val	Missense variant	0.233645
OSU431895	GLI3	ENSCAFT00000049220.2	chr18:8054666C>G	.	c.1758C>G	p.Phe586Leu	Missense variant	0.260563
OSU431895	KIFC3	ENSCAFT00000035418.2	chr2:58730920C>T	.	c.2314C>T	p.Arg772Cys	Missense variant	0.225352
OSU431895	ABCC12	ENSCAFT00000016220.4	chr2:66965092G>A	.	c.3800G>A	p.Arg1267His	Missense variant	0.244156
OSU431895	DNAJC8	ENSCAFT00000018890.4	chr2:72193839T>C	rs851990132	c.2T>C	p.Met1?	Start-lost variant	0.0625
OSU431895	EXTL1	ENSCAFT00000020161.3	chr2:73934086C>A	.	c.1516-1G>T	.	Splice acceptor variant	0.210526
OSU431895	PGD	ENSCAFT00000026597.3	chr2:85397951C>G	.	c.780G>C	p.Gln260His	Missense variant	0.0584615
OSU431895	ARHGAP21	ENSCAFT00000044523.2	chr2:8864689G>C	.	c.3373G>C	p.Asp1125His	Missense variant	0.0728477
OSU431895	FOXP1	ENSCAFT00000010476.3	chr20:21009967G>T	.	c.1834G>T	p.Glu612*	Stop-gained variant	0.222772
OSU431895	FAM3D	ENSCAFT00000043106.2	chr20:32037061G>C	.	c.417G>C	p.Glu139Asp	Missense variant	0.297297
OSU431895	HDAC11	ENSCAFT00000007075.3	chr20:3812849G>A	.	c.481G>A	p.Glu161Lys	Missense variant	0.30605
OSU431895	PODNL1	ENSCAFT00000026169.4	chr20:48545684C>T	.	c.498-3C>T	.	Splice region variant	0.333333
OSU431895	ZSWIM4	ENSCAFT00000026294.4	chr20:48633250G>A	.	c.1492C>T	p.Arg498Trp	Missense variant	0.28125
OSU431895	PLXND1	ENSCAFT00000007454.4	chr20:5587327G>A	.	c.2626G>A	p.Asp876Asn	Missense variant	0.277311
OSU431895	ENSCAFG00000023709	ENSCAFT00000036630.3	chr20:57338199G>C	.	c.1740C>G	p.Phe580Leu	Missense variant	0.0436364
OSU431895	INPPL1	ENSCAFT00000009283.3	chr21:25902321C>A	.	c.2901G>T	p.Leu967Phe	Missense variant	0.318612
OSU431895	TRIM34	ENSCAFT00000010112.4	chr21:28642194G>C	.	c.1476G>C	p.Glu492Asp	Missense variant	0.280757
OSU431895	ENSCAFG00000029611	ENSCAFT00000010146.2	chr21:28714549A>C	.	c.883A>C	p.Thr295Pro	Missense variant	0.254115
OSU431895	WEE1	ENSCAFT00000011883.4	chr21:32843558C>T	.	c.239C>T	p.Pro80Leu	Missense variant	0.326733
OSU431895	DNAJC13	ENSCAFT00000010177.3	chr23:29437198C>A	.	c.1350-7C>A	.	Splice region variant	0.212121
OSU431895	C20orf194	ENSCAFT00000010311.3	chr24:17958191G>C	.	c.706G>C	p.Glu236Gln	Missense variant	0.221557
OSU431895	CTSA	ENSCAFT00000015596.4	chr24:33188262T>TAAGGCA	.	c.1311+2_1311+3insAAGGCA	.	Splice region variant	0.156863
OSU431895	NEFM	ENSCAFT00000014336.4	chr25:32494886C>G	.	c.1712G>C	p.Gly571Ala	Missense variant	0.416974
OSU431895	CCDC60	ENSCAFT00000015857.3	chr26:15594632G>A	.	c.959G>A	p.Gly320Glu	Missense variant	0.402135
OSU431895	CMKLR1	ENSCAFT00000018084.3	chr26:18533484C>G	.	c.1006C>G	p.Leu336Val	Missense variant	0.0558659
OSU431895	SFI1	ENSCAFT00000049951.2	chr26:24502091G>A	.	c.3778G>A	p.Glu1260Lys	Missense variant	0.138889
OSU431895	PCDH15	ENSCAFT00000024635.3	chr26:34566585C>T	.	c.4160C>T	p.Pro1387Leu	Missense variant	0.153846
OSU431895	PPHLN1	ENSCAFT00000046129.1	chr27:11571694C>G	.	c.241G>C	p.Asp81His	Missense variant	0.267974
OSU431895	MAP3K12	ENSCAFT00000011109.3	chr27:1731327C>G	.	c.997C>G	p.Leu333Val	Missense variant	0.0615385
OSU431895	CCDC91	ENSCAFT00000017424.3	chr27:19461973C>T	.	c.461G>A	p.Arg154Lys	Missense variant	0.336538
OSU431895	CASC1	ENSCAFT00000018157.4	chr27:22364318G>A	.	c.838G>A	p.Glu280Lys	Missense variant	0.287879
OSU431895	CLEC9A	ENSCAFT00000021464.2	chr27:35920820G>C	.	c.472-4C>G	.	Splice region variant	0.285714
OSU431895	DDX11	ENSCAFT00000024894.3	chr27:42079676G>C	.	c.357G>C	p.Gln119His	Missense variant	0.185897
OSU431895	B4GALNT3	ENSCAFT00000025016.4	chr27:42598333T>TATGG	.	c.2729_2730insATGG	p.Met910fs	Frameshift variant	0.317949
OSU431895	SEMA4G	ENSCAFT00000015460.4	chr28:13667893G>A	.	c.813+3G>A	.	Splice region variant	0.234375
OSU431895	PPRC1	ENSCAFT00000015971.4	chr28:14677374G>GC	.	c.2798dupC	p.Pro934fs	Frameshift variant	0.288288
OSU431895	CHAT	ENSCAFT00000010762.4	chr28:1528602C>G	.	c.2070C>G	p.Phe690Leu	Missense variant	0.186047
OSU431895	PCGF6	ENSCAFT00000044220.2	chr28:15733030G>A	.	c.68C>T	p.Pro23Leu	Missense variant	0.214286
OSU431895	ENSCAFG00000006847	ENSCAFT00000011021.4	chr28:1916659C>T	.	c.2984C>T	p.Ser995Phe	Missense variant	0.203297
OSU431895	PNLIPRP1	ENSCAFT00000018834.2	chr28:27169312G>C	.	c.306G>C	p.Glu102Asp	Missense variant	0.279592
OSU431895	PTPRE	ENSCAFT00000021005.3	chr28:36867151G>A	.	c.532G>A	p.Glu178Lys	Missense variant	0.0666667
OSU431895	ENSCAFG00000013695	ENSCAFT00000021723.3	chr28:40788958G>C	.	c.676G>C	p.Ala226Pro	Missense variant	0.419048
OSU431895	SGK3	ENSCAFT00000011773.3	chr29:16344963G>C	.	c.69G>C	p.Lys23Asn	Missense variant	0.271429
OSU431895	ZFHX4	ENSCAFT00000013195.4	chr29:24832205C>T	.	c.4735C>T	p.Pro1579Ser	Missense variant	0.173611
OSU431895	CPNE3	ENSCAFT00000014109.2	chr29:32727523C>G	.	c.1580C>G	p.Pro527Arg	Missense variant	0.18429
OSU431895	EDIL3	ENSCAFT00000013454.3	chr3:23711511A>G	.	c.652-2A>G	.	Splice acceptor variant	0.0853659
OSU431895	POLK	ENSCAFT00000014935.3	chr3:30798334G>C	.	c.1731C>G	p.Phe577Leu	Missense variant	0.245033
OSU431895	HOMER2	ENSCAFT00000020916.3	chr3:54661523C>G	.	c.895G>C	p.Glu299Gln	Missense variant	0.341463
OSU431895	ARAP2	ENSCAFT00000025868.3	chr3:75726700C>G	.	c.2723C>G	p.Ser908Cys	Missense variant	0.288136
OSU431895	PPIP5K2	ENSCAFT00000012054.4	chr3:8082899C>G	.	c.17G>C	p.Arg6Thr	Missense variant	0.214765
OSU431895	RNF111	ENSCAFT00000026314.3	chr30:24024406GAC>G	.	c.2786_2787delCA	p.Thr929fs	Frameshift variant	0.234043
OSU431895	EIF2AK4	ENSCAFT00000014032.4	chr30:7189333G>C	.	c.1602G>C	p.Leu534Phe	Missense variant	0.210407
OSU431895	INO80	ENSCAFT00000015097.3	chr30:8118915G>C	.	c.3510-6C>G	.	Splice region variant	0.331361
OSU431895	NRIP1	ENSCAFT00000012894.3	chr31:11858097G>A	.	c.1301C>T	p.Ser434Phe	Missense variant	0.218404
OSU431895	ENSCAFG00000029964	ENSCAFT00000046703.1	chr31:37278435G>C	.	c.2336G>C	p.Arg779Thr	Missense variant	0.22108
OSU431895	PTPN13	ENSCAFT00000014995.3	chr32:10260336G>C	.	c.2377G>C	p.Gly793Arg	Missense variant	0.264851
OSU431895	TRMT10C	ENSCAFT00000048115.1	chr33:7948899TTAGA>T	.	c.1016_1019delGATA	p.Arg339fs	Frameshift variant	0.270718
OSU431895	IRX4	ENSCAFT00000016576.3	chr34:10928929G>C	.	c.714G>C	p.Glu238Asp	Missense variant	0.217949
OSU431895	CCDC127	ENSCAFT00000017573.3	chr34:11975238C>G	.	c.533C>G	p.Ser178Cys	Missense variant	0.240602
OSU431895	PEX5L	ENSCAFT00000018246.2	chr34:13199570C>A	.	c.994G>T	p.Asp332Tyr	Missense variant	0.174825
OSU431895	PEX5L	ENSCAFT00000018246.2	chr34:13292410C>A	.	c.97G>T	p.Glu33*	Stop-gained variant	0.25
OSU431895	SI	ENSCAFT00000022936.3	chr34:30322770G>A	.	c.3631-8C>T	.	Splice region variant	0.224576
OSU431895	DLX1	ENSCAFT00000020533.3	chr36:16487766G>A	.	c.648G>A	p.Trp216*	Stop-gained variant	0.235099
OSU431895	HOXD10	ENSCAFT00000021329.3	chr36:19926791G>C	.	c.1014G>C	p.Lys338Asn	Missense variant	0.149171
OSU431895	METTL21A	ENSCAFT00000042739.1	chr37:16001841G>T	.	c.103C>A	p.Gln35Lys	Missense variant	0.229885
OSU431895	USH2A	ENSCAFT00000017072.3	chr38:11478108C>T	.	c.5017G>A	p.Glu1673Lys	Missense variant	0.266304
OSU431895	DISP1	ENSCAFT00000018051.3	chr38:23718354G>T	.	c.2562C>A	p.Phe854Leu	Missense variant	0.249351
OSU431895	LRRTM3	ENSCAFT00000043912.1	chr4:18322023C>G	.	c.83C>G	p.Ser28Cys	Missense variant	0.143174
OSU431895	AIFM2	ENSCAFT00000022236.3	chr4:21089398G>A	.	c.968C>T	p.Pro323Leu	Missense variant	0.176796
OSU431895	MCU	ENSCAFT00000023057.4	chr4:23496896G>A	.	c.508G>A	p.Glu170Lys	Missense variant	0.146919
OSU431895	LRIT1	ENSCAFT00000025227.3	chr4:32476147G>A	.	c.560C>T	p.Ala187Val	Missense variant	0.459144
OSU431895	SYNPO	ENSCAFT00000028748.2	chr4:58504820G>T	.	c.1297C>A	p.Leu433Met	Missense variant	0.181467
OSU431895	PPARGC1B	ENSCAFT00000029039.4	chr4:59184211C>G	.	c.2102G>C	p.Gly701Ala	Missense variant	0.206186
OSU431895	CDH10	ENSCAFT00000030188.3	chr4:81100231G>T	.	c.1984G>T	p.Gly662Cys	Missense variant	0.503497
OSU431895	ACTA1	ENSCAFT00000013094.3	chr4:9813995G>A	.	c.802G>A	p.Asp268Asn	Missense variant	0.548654
OSU431895	TP53	ENSCAFT00000026465.3	chr5:32564571C>T	.	c.338G>A	p.Trp113*	Stop-gained variant	0.357798
OSU431895	TEKT3	ENSCAFT00000028445.3	chr5:38884781G>C	.	c.884C>G	p.Ser295*	Stop-gained variant	0.206897
OSU431895	LRRC75A	ENSCAFT00000028610.3	chr5:39486746G>A	.	c.661G>A	p.Glu221Lys	Missense variant	0.277473
OSU431895	C1orf168	ENSCAFT00000043811.2	chr5:52680875G>T	.	c.4G>T	p.Glu2*	Stop-gained variant	0.0731707
OSU431895	TTC22	ENSCAFT00000043914.2	chr5:54379139C>G	.	c.1226C>G	p.Thr409Arg	Missense variant	0.3125
OSU431895	ARHGAP32	ENSCAFT00000016261.3	chr5:5656268C>G	.	c.1238C>G	p.Ser413Cys	Missense variant	0.318182
OSU431895	MYLPF	ENSCAFT00000026205.3	chr6:17721053G>C	.	c.79C>G	p.Gln27Glu	Missense variant	0.282051
OSU431895	USP31	ENSCAFT00000028068.3	chr6:22652611C>A	.	c.677C>A	p.Ser226Tyr	Missense variant	0.233628
OSU431895	USP31	ENSCAFT00000028068.3	chr6:22662881C>G	.	c.1120C>G	p.Leu374Val	Missense variant	0.04375
OSU431895	DNASE1	ENSCAFT00000030587.3	chr6:37599193C>G	.	c.111G>C	p.Lys37Asn	Missense variant	0.21542
OSU431895	NAA60	ENSCAFT00000030602.3	chr6:37768888C>G	.	c.64G>C	p.Asp22His	Missense variant	0.121212
OSU431895	CLCA4	ENSCAFT00000032245.3	chr6:61560679C>G	.	c.2152G>C	p.Glu718Gln	Missense variant	0.321918
OSU431895	PROX1	ENSCAFT00000019756.3	chr7:12043975G>C	.	c.2214G>C	p.Ter738Tyr	Stop-lost variant	0.149091
OSU431895	HMCN1	ENSCAFT00000021686.3	chr7:19225514T>G	.	c.15040T>G	p.Tyr5014Asp	Missense variant	0.249412
OSU431895	ENSCAFG00000015015	ENSCAFT00000023838.3	chr7:28268707C>G	.	c.1059C>G	p.Phe353Leu	Missense variant	0.25228
OSU431895	ADCY10	ENSCAFT00000024423.3	chr7:30619392G>C	.	c.2301G>C	p.Lys767Asn	Missense variant	0.2
OSU431895	POGK	ENSCAFT00000024738.3	chr7:31535670C>T	.	c.1421G>A	p.Arg474His	Missense variant	0.271663
OSU431895	ARHGEF11	ENSCAFT00000026129.3	chr7:41096724G>T	.	c.4490G>T	p.Arg1497Ile	Missense variant	0.137652
OSU431895	ENSCAFG00000016616	ENSCAFT00000026393.3	chr7:41397488C>A	.	c.981+3C>A	.	Splice region variant	0.269663
OSU431895	DSG3	ENSCAFT00000028690.2	chr7:58064476G>C	.	c.565C>G	p.Leu189Val	Missense variant	0.0503432
OSU431895	ENSCAFG00000014787	ENSCAFT00000023469.4	chr7:5963617A>G	rs852402061	c.289T>C	p.Cys97Arg	Missense variant	0.380952
OSU431895	OSBPL1A	ENSCAFT00000022395.3	chr7:64217266G>C	.	c.2611G>C	p.Asp871His	Missense variant	0.0465116
OSU431895	CLUL1	ENSCAFT00000029136.4	chr7:67472732G>A	.	c.931G>A	p.Glu311Lys	Missense variant	0.231362
OSU431895	MIS18BP1	ENSCAFT00000022361.4	chr8:22653837G>A	.	c.1346C>T	p.Ser449Phe	Missense variant	0.19242
OSU431895	ZBTB1	ENSCAFT00000043977.1	chr8:38950418G>T	.	c.149G>T	p.Arg50Ile	Missense variant	0.242315
OSU431895	ELMSAN1	ENSCAFT00000026701.4	chr8:46997477G>A	.	c.1016C>T	p.Ser339Phe	Missense variant	0.216274
OSU431895	NRXN3	ENSCAFT00000043139.1	chr8:51608485C>G	.	c.2094C>G	p.Phe698Leu	Missense variant	0.204433
OSU431895	SERPINA6	ENSCAFT00000027978.3	chr8:63335846C>T	.	c.76G>A	p.Asp26Asn	Missense variant	0.194346
OSU431895	SYNE3	ENSCAFT00000028095.3	chr8:64304289C>T	.	c.1278G>A	p.Met426Ile	Missense variant	0.0410959
OSU431895	ATP6V0A1	ENSCAFT00000023874.3	chr9:20460130C>G	.	c.457G>C	p.Asp153His	Missense variant	0.2
OSU431895	MYCBPAP	ENSCAFT00000027070.4	chr9:26473031G>C	.	c.1902G>C	p.Trp634Cys	Missense variant	0.171521
OSU431895	COX11	ENSCAFT00000027487.2	chr9:30079609C>G	.	c.225G>C	p.Glu75Asp	Missense variant	0.270642
OSU431895	MED13	ENSCAFT00000028083.3	chr9:34722633C>G	.	c.3863C>G	p.Ser1288Cys	Missense variant	0.174632
OSU431895	SEPT9	ENSCAFT00000008383.4	chr9:3504856C>G	.	c.1159G>C	p.Glu387Gln	Missense variant	0.214939
OSU431895	HEATR6	ENSCAFT00000028841.3	chr9:37581109C>A	.	c.2851G>T	p.Glu951*	Stop-gained variant	0.21519
OSU431895	MYO1D	ENSCAFT00000029185.3	chr9:40171560T>A	.	c.74T>A	p.Phe25Tyr	Missense variant	0.133005
OSU431895	SMG6	ENSCAFT00000030579.3	chr9:46402831G>C	.	c.385C>G	p.Leu129Val	Missense variant	0.22623
OSU431895	LRRC26	ENSCAFT00000031014.3	chr9:48491434C>T	.	c.440C>T	p.Ser147Phe	Missense variant	0.195
OSU431895	NPDC1	ENSCAFT00000031030.3	chr9:48599176G>C	.	c.125G>C	p.Cys42Ser	Missense variant	0.2
OSU431895	HMCN2	ENSCAFT00000031743.4	chr9:53491794G>C	.	c.14144-4C>G	.	Splice region variant	0.236364
OSU431895	PBX3	ENSCAFT00000032127.3	chr9:57200010C>T	.	c.1042G>A	p.Glu348Lys	Missense variant	0.21327
OSU431895	FAM120C	ENSCAFT00000047380.2	chrX:45984653T>A	.	c.2524-2A>T	.	Splice acceptor variant	0.555556
OSU431895	GNL3L	ENSCAFT00000026083.3	chrX:46294904A>G	.	c.1736A>G	p.Asn579Ser	Missense variant	0.509934
OSU431895	ENSCAFG00000017103	ENSCAFT00000043925.2	chrX:55730703G>C	.	c.4635+1G>C	.	Splice donor variant	0.477064

## Sheet: Supplementary Table 5
Supplementary Table 5. Somatic copy number variants identified by exome sequencing in primary canine lung cancers.
Patient ID	Region	Mutation type	Log2 ratio	Number of genes	Gene symbols
CCB010387	chr6:16860700-16899200	Deletion	-1.6779	2	ENSCAFG00000014312,ITGAX
CCB010387	chr11:41162150-41570250	Deletion	-1.8457	5	ENSCAFG00000001671,CDKN2A,CDKN2B,CDKN2B-AS,DMRTA1
CCB050227	chr1:101588650-101590100	Deletion	-1.0814	1	ZNF583
CCB050227	chr1:114616500-114618000	Deletion	-1.0175	1	GGN
CCB050227	chr1:115950650-115971150	Deletion	-1.1607	1	ZNF568
CCB050227	chr1:1262250-1351300	Deletion	-1.0325	1	ATP9B
CCB050227	chr1:13653250-13668550	Deletion	-1.0799	1	VPS4B
CCB050227	chr1:14587900-14652700	Deletion	-1.1356	1	KIAA1468
CCB050227	chr1:24470250-24495400	Deletion	-1.052	1	ENSCAFG00000000172
CCB050227	chr1:88139500-88149900	Deletion	-1.1038	1	TJP2
CCB050227	chr5:16623600-16656850	Deletion	-1.0154	1	SIK3
CCB050227	chr5:50042500-50060250	Deletion	-1.1865	1	HOOK1
CCB050227	chr5:80028150-80046050	Deletion	-1.1114	1	NFAT5
CCB050227	chr5:80637850-80668100	Deletion	-1.1047	1	TANGO6
CCB050227	chr5:82027000-82066250	Deletion	-1.0096	1	LRRC36
CCB050227	chr11:13400700-13453950	Deletion	-1.1525	1	CSNK1G3
CCB050227	chr11:34502800-34603350	Deletion	-1.0815	1	NFIB
CCB050227	chr11:53633600-53683150	Deletion	-1.0852	1	ZCCHC7
CCB050227	chr20:16807200-16813950	Deletion	-1.0215	1	CHL1
CCB050227	chr20:5497850-5521750	Deletion	-1.0239	1	TMCC1
CCB050227	chr20:6053750-6071150	Deletion	-1.0576	1	TSEN2
CCB050227	chr25:14121350-14153400	Deletion	-1.1147	1	NUPL1
CCB050227	chr25:23987000-24141250	Deletion	-1.1921	1	SCRG1
CCB050227	chr25:5377350-5415550	Deletion	-1.2073	1	NBEA
CCB050227	chr26:16636650-16760250	Deletion	-1.0642	1	SPPL3
CCB050227	chr26:23276850-23287100	Deletion	-1.0595	1	HORMAD2
CCB050227	chr28:12949400-12961350	Deletion	-1.1388	1	ERLIN1
CCB050227	chr28:16317950-16344200	Deletion	-1.1552	1	SLK
CCB050227	chr28:16528300-16554600	Deletion	-1.0746	1	WDR96
CCB050227	chr28:25605300-25628800	Deletion	-1.0107	1	FAM160B1
CCB050227	chr28:6344700-6352100	Deletion	-1.1796	1	TNKS2
CCB050227	chr28:9938900-9970600	Deletion	-1.1972	1	TM9SF3
CCB050227	chr1:104802900-104871300	Deletion	-1.0366	2	ZNF677,ENSCAFG00000030568
CCB050227	chr1:115014800-115040300	Deletion	-1.0106	2	WDR87,ENSCAFG00000005986
CCB050227	chr1:117852000-117918100	Deletion	-1.0193	2	WTIP,UBA2
CCB050227	chr1:118064500-118424400	Deletion	-1.0721	2	LSM14A,KCTD15
CCB050227	chr1:57669100-57755450	Deletion	-1.243	2	ROS1,DCBLD1
CCB050227	chr1:60692600-60847950	Deletion	-1.117	2	TBC1D32,U4
CCB050227	chr1:93409500-93472450	Deletion	-1.1313	2	JAK2,INSL6
CCB050227	chr5:12766050-12881800	Deletion	-1.0626	2	SC5D,TECTA
CCB050227	chr5:13533650-13675900	Deletion	-1.0241	2	ARHGEF12,TMEM136
CCB050227	chr5:22311300-22332900	Deletion	-1.0314	2	ARHGAP20,ENSCAFG00000014234
CCB050227	chr5:22572050-22626450	Deletion	-1.177	2	RDX,ENSCAFG00000030803
CCB050227	chr5:39611050-39791800	Deletion	-1.0144	2	PIGL,NCOR1
CCB050227	chr5:75323800-75486400	Deletion	-1.0383	2	BCAR1,P97
CCB050227	chr5:76498150-76518750	Deletion	-1.0017	2	SF3B3,SNORD111
CCB050227	chr8:15222200-15245050	Amplification	0.5121	2	PAX9,SLC25A21
CCB050227	chr8:24675500-25005850	Amplification	0.607	2	ENSCAFG00000030425,ENSCAFG00000014169
CCB050227	chr8:30604100-30734800	Amplification	0.555	2	SAMD4A,GCH1
CCB050227	chr8:43099450-43211550	Amplification	0.6235	2	GALNT16,ERH
CCB050227	chr8:50628500-50964200	Amplification	0.7957	2	ADCK1,ENSCAFG00000017256
CCB050227	chr8:59710850-59726350	Amplification	0.5688	2	SPATA7,PTPN21
CCB050227	chr9:40651600-40727650	Amplification	0.5736	2	RHBDL3,RHOT1
CCB050227	chr9:49620900-49635200	Amplification	0.8816	2	ENSCAFG00000019749,LCN9
CCB050227	chr11:37273900-37759000	Deletion	-1.0549	2	CNTLN,SH3GL2
CCB050227	chr11:45666650-45998200	Deletion	-1.1213	2	C9orf72,U6
CCB050227	chr11:50641550-50681000	Deletion	-1.1092	2	UBE2R2,UBAP2
CCB050227	chr11:51683900-51838300	Deletion	-1.0625	2	FAM214B,UNC13B
CCB050227	chr11:59243050-59630000	Deletion	-1.1042	2	CYLC2,ENSCAFG00000030806
CCB050227	chr11:66259850-66356900	Deletion	-1.0879	2	DNAJC25,C9orf84
CCB050227	chr20:19122650-19193700	Deletion	-1.1216	2	PPP4R2,GXYLT2
CCB050227	chr20:8783600-9056800	Deletion	-1.0515	2	THUMPD3,SRGAP3
CCB050227	chr20:9183300-9359800	Deletion	-1.0094	2	RAD18,OXTR
CCB050227	chr25:31211750-31478850	Deletion	-1.2779	2	PPP2R2A,EBF2
CCB050227	chr25:34763150-34859650	Deletion	-1.1124	2	PPP3CC,SLC39A14
CCB050227	chr26:14606350-14716700	Deletion	-1.073	2	TAOK3,SUDS3
CCB050227	chr26:31044900-31132600	Deletion	-1.0995	2	MAPK1,ENSCAFG00000015433
CCB050227	chr26:9121150-9226900	Deletion	-1.2128	2	ATXN2,BRAP
CCB050227	chr28:2385200-2443800	Deletion	-1.0395	2	ENSCAFG00000025080,ZNF22
CCB050227	chr28:29967400-30011800	Deletion	-1.125	2	C10ORF119,SEC23IP
CCB050227	chr1:100189600-100251600	Deletion	-1.0589	3	ENSCAFG00000029340,ENSCAFG00000002408,ENSCAFG00000028494
CCB050227	chr1:108762600-108875300	Deletion	-1.0459	3	ZC3H4,SAE1,U6
CCB050227	chr1:31181550-31363550	Deletion	-1.1872	3	ENSCAFG00000000279,ABRACL,HECA
CCB050227	chr8:39141750-39307050	Amplification	0.6613	3	PLEKHG3,SPTB,CHURC1
CCB050227	chr8:50039400-50117050	Amplification	0.6604	3	TMEM63C,NGB,POMT2
CCB050227	chr8:50142700-50182850	Amplification	0.5886	3	GSTZ1,TMED8,SAMD15
CCB050227	chr9:26660200-26737000	Amplification	0.625	3	ENSCAFG00000028954,WFIKKN2,TOB1
CCB050227	chr11:26772200-26905000	Deletion	-1.1166	3	MATR3,5_8S_rRNA,MLANA
CCB050227	chr11:52696650-53066800	Deletion	-1.0224	3	GNE,RNF38,MELK
CCB050227	chr20:12487050-12643600	Deletion	-1.1602	3	ARL8B,U6,BHLHE40
CCB050227	chr20:25130300-25315200	Deletion	-1.2147	3	SLC25A26,SNORA64,ENSCAFG00000030398
CCB050227	chr20:48455100-48457500	Deletion	-1.0294	3	C19orf57,PALM3,IL27RA
CCB050227	chr25:11442900-11617250	Deletion	-1.0477	3	PAN3,U2,FLT3
CCB050227	chr25:26545700-26716350	Deletion	-1.0077	3	ENSCAFG00000008018,MTMR9,ENSCAFG00000030648
CCB050227	chr28:13609300-13667850	Deletion	-1.0149	3	FAM178A,U2,SEMA4G
CCB050227	chr28:26978900-27145400	Deletion	-1.068	3	CCDC172,5S_rRNA,PNLIP
CCB050227	chr28:8624500-8738150	Deletion	-1.1155	3	TBC1D12,HELLS,CYP2C21
CCB050227	chr1:106859600-106876300	Deletion	-1.0013	4	PRMT1,U4,BCL2L12,IRF3
CCB050227	chr1:48948500-49011800	Deletion	-1.0667	4	SOD2,ENSCAFG00000023207,U6atac,ACAT2
CCB050227	chr5:39245200-39386800	Deletion	-1.0097	4	ENSCAFG00000031764,5S_rRNA,ZNF624,ZNF287
CCB050227	chr5:55863850-55996900	Deletion	-1.0411	4	PODN,SCP2,HES4,ZYG11A
CCB050227	chr9:35169500-35405000	Amplification	0.5976	4	TBX4,ENSCAFG00000017742,TBX2,BCAS3
CCB050227	chr11:66765850-66883100	Deletion	-1.1198	4	PTBP3,ENSCAFG00000032333,ENSCAFG00000003019,HSDL2
CCB050227	chr1:70052550-70308350	Deletion	-1.0307	5	ZNF782,ZNF510,AAED1,ENSCAFG00000030594,CDC14B
CCB050227	chr8:49368700-49674550	Amplification	0.7291	5	ESRRB,7SK,ENSCAFG00000004150,VASH1,ANGEL1
CCB050227	chr9:43672450-43745900	Amplification	0.5282	5	TP53I13,GIT1,ANKRD13B,CORO6,SSH2
CCB050227	chr9:41103200-41486150	Amplification	0.5367	6	COPRS,U6,cfa-mir-365-2,cfa-mir-193a,RAB11FIP4,NF1
CCB050227	chr9:60349750-61040500	Amplification	0.5768	6	LHX6,MORN5,NDUFA8,TTLL11,DAB2IP,GGTA1
CCB050227	chr26:6792950-7092600	Deletion	-1.0275	6	KNTC1,RSRC2,ZCCHC8,SNORA9,CLIP1,ENSCAFG00000007919
CCB050227	chr9:46063700-46384700	Amplification	0.5435	7	RTN4RL1,DPH1,DPH1,cfa-mir-132,cfa-mir-212,HIC1,SMG6
CCB050227	chr11:45083850-45278650	Deletion	-1.0307	7	CAAP1,PLAA,IFT74,LRRC19,cfa-mir-872,U6,TEK
CCB050227	chr9:3074200-4005250	Amplification	0.565	9	TNRC6C,ENSCAFG00000031705,ENSCAFG00000030116,SEPT9,SEC14L1,ENSCAFG00000031523,SCARNA16,MGAT5B,MFSD11
CCB050227	chr9:54720850-54897300	Amplification	0.5341	10	CRAT,PHYHD1,LRRC8A,CCBL1,C9orf114,ENDOG,TBC1D13,ZER1,ZDHHC12,PKN3
CCB050227	chr9:58444650-58930100	Amplification	0.5732	10	NR6A1,U6,SF1,GPR144,PSMB7,NEK6,ENSCAFG00000031433,LHX2,DENND1A,ENSCAFG00000030642
CCB050227	chr9:42927400-43374900	Amplification	0.5401	13	TLCD1,NEK8,TRAF4,FAM222B,cfa-mir-451,cfa-mir-451,cfa-mir-144,FLOT2,PHF12,SEZ6,PIPOX,MYO18A,CRYBA3
CCB050227	chr11:40300200-41570200	Deletion	-2.6435	14	FOCAD,cfa-mir-491,U6,SNORA30,PTPLAD2,IFNB1,ENSCAFG00000023674,IFNE,cfa-mir-31,ENSCAFG00000001671,CDKN2A,CDKN2B,CDKN2B-AS,DMRTA1
CCB050227	chr9:53936050-54686900	Amplification	0.5133	21	FNBP1,U6,USP20,ENSCAFG00000019979,TOR1A,ENSCAFG00000032504,TOR1B,ENSCAFG00000030536,PTGES,PRRX2,Y_RNA,ASB6,NTMT1,ENSCAFG00000019987,IER5L,PPP2R4,CRAT,DOLPP1,FAM73B,SH3GLB2,ENSCAFG00000020013
CCB050227	chr8:70013700-71225650	Amplification	0.535	24	DYNC1H1,ENSCAFG00000031259,HSP90AA1,WDR20,MOK,ZNF839,CINP,TECPR2,ANKRD9,RPL36,RCOR1,TRAF3,AMN,CDC42BPB,ENSCAFG00000018184,ENSCAFG00000032097,ENSCAFG00000032732,TNFAIP2,ENSCAFG00000018194,EIF5,SNORA28,MARK3,U2,U4
CCB050227	chr9:51995100-53770350	Amplification	0.5779	27	NTNG2,MED27,SNORA63,RAPGEF1,PRRC2B,UCK1,POMT1,SNORD62,SNORD62,PPAPDC3,FAM78A,NUP214,U6,AIF1L,ENSCAFG00000028859,LAMC3,FIBCD1,QRFP,ABL1,EXOSC2,PRDM12,FUBP3,LAMTOR5,ASS1,HMCN2,NCS1,GPR107
CCB050227	chr9:25772300-26604200	Amplification	0.5339	29	SLC35B1,FAM117A,KAT7,TAC4,DLX4,DLX3,ENSCAFG00000028938,ITGA3,SAMD14,PDK2,PPP1R9B,SGCA,ENSCAFG00000017016,COL1A1,snoU2_19,snoU2-30,TMEM92,ENSCAFG00000017025,XYLT2,MRPL27,EME1,LRRC59,ACSF2,CHAD,MYCBPAP,EPN3,CACNA1G,ABCC3,ANKRD40
CCB050227	chr9:4029500-4879850	Amplification	0.5243	42	ENSCAFG00000005147,METTL23,JMJD6,ST6GALNAC1,ST6GALNAC2,snoR38,snoR38,ENSCAFG00000030147,PRCD,CYGB,RHBDF2,AANAT,UBE2O,SPHK1,ENSCAFG00000028615,ENSCAFG00000031566,PRPSAP1,RNaseP_nuc,QRICH2,RNF157,FOXJ1,EXOC7,ZACN,GALR2,SRP68,ENSCAFG00000005021,CDK3,TEN1,ACOX1,FBF1,MRPL38,TRIM65,TRIM47,WBP2,UNC13D,UNK,U4,H3F3B,GALK1,ENSCAFG00000029346,ENSCAFG00000004905,SAP30BP
CCB050227	chr9:49635400-51859600	Amplification	0.6491	55	LCN9,GLT6D1,ENSCAFG00000019754,ENSCAFG00000023097,ENSCAFG00000019755,LCN1,ABO,SURF6,MED22,ENSCAFG00000017680,SNORD24,SNORD36,SNORD36,SNORD36,SURF1,SURF2,SURF4,C9orf96,REXO4,ADAMTS13,CACFD1,SLC2A6,TMEM8C,ADAMTSL2,ENSCAFG00000031627,DBH,SARDH,VAV2,U6,BRD3,U6,WDR5,RXRALPHA,ENSCAFG00000026559,COL5A1,ENSCAFG00000030630,OLFM1,PPP1R26,ENSCAFG00000032138,MRPS2,ENSCAFG00000031986,ENSCAFG00000019863,GBGT1,…
CCB050227	chr8:71438200-74292900	Amplification	0.6229	61	ENSCAFG00000018285,XRCC3,ZFYVE21,PPP1R13B,U6,RD3L,TDRD9,ASPG,cfa-mir-203,cfa-mir-203,KIF26A,ENSCAFG00000030362,U1,ENSCAFG00000029088,C14orf180,TMEM179,ENSCAFG00000029862,ENSCAFG00000031878,INF2,ENSCAFG00000028959,ADSSL1,AKT1,ZBTB42,CEP170B,PLD4,ENSCAFG00000030682,ENSCAFG00000030662,C14orf79,CDCA4,GPR132,JAG2,NUDT14,BRF1,BTBD6,PACS2,TEX22,MTA1,CRIP2,ENSCAFG00000018440,ENSCAFG00000031417,C14orf80,T…
CCB050227	chr9:4907300-9309800	Amplification	0.525	68	SAP30BP,RECQL5,MYO15B,LLGL2,TSEN54,ENSCAFG00000030695,CASKIN2,KIAA0195,GRB2,SLC25A19,ENSCAFG00000004756,MRPS7,GGA3,NUP85,SUMO2,HN1,NT5C,ARMC7,SLC16A5,ENSCAFG00000004715,ENSCAFG00000032582,KCTD2,ENSCAFG00000004703,ICT1,CDR2L,HID1,OTOP3,USH1G,FADS6,FDXR,GRIN2C,TMEM104,NAT9,SLC9A3R1,RAB37,ENSCAFG00000004595,CD300E,ENSCAFG00000028809,ENSCAFG00000024944,ENSCAFG00000024942,ENSCAFG00000028912,ENSCAFG000…
CCB050227	chr8:3546450-9927850	Amplification	0.5262	77	HOMEZ,PPP1R3E,BCL2L2,PABPN1,SLC22A17,EFS,IL25,CMTM5,cfa-mir-208a,MYH7,cfa-mir-208b,NGDN,ZFHX2,AP1G2,THTPA,DHRS2,ENSCAFG00000025298,DHRS4,LRRC16B,CPNE6,NRL,PCK2,DCAF11,FITM1,PSME1,EMC9,PSME2,ENSCAFG00000011993,IRF9,REC8,IPO4,ENSCAFG00000012071,TSSK4,NEDD8,GMPR2,TINF2,TGM1,RABGGTA,DHRS1,C14ORF21,CIDEB,LTB4R,ADCY4,RIPK3,U6,NFATC4,NYNRIN,CBLN3,KHNYN,7SK,SDR39U1,U6,CMA1,ENSCAFG00000025404,CTSG,GZMB,U6…
CCB050227	chr9:96600-3044550	Amplification	0.6024	91	CSNK1D,SLC16A3,RFNG,SNORA62,CCDC57,FASN,DUS1L,GPS1,DCXR,RAC3,LRRC45,STRA13,ASPSCR1,TSPAN10,NOTUM,MYADML2,PYCR1,MAFG,SIRT7,PCYT2,NPB,ANAPC11,ALYREF,ARHGDIA,P4HB,PPP1R27,FAM195B,GCGR,ENSCAFG00000005812,HGS,ARL16,CCDC137,OXLD1,PDE6G,NPLOC4,ENSCAFG00000030278,C17orf70,FSCN2,ACTG1,ENSCAFG00000032216,ENSCAFG00000005732,SLC38A10,C17orf89,ENTHD2,AZI1,AATK,cfa-mir-338,BAIAP2,CHMP6,RPTOR,U4,NPTX1,RNF213,EN…
CCB050227	chr9:46737800-49619100	Amplification	0.5987	114	CLUH,ENSCAFG00000023030,RAP1GAP2,ENSCAFG00000019307,ENSCAFG00000019310,OR1A2,OR1P2,OR3A1,ENSCAFG00000032680,GNG10,ENSCAFG00000019324,ENSCAFG00000019325,DTMT,SPATA22,ASPA,TRPV3,TRPV1,SHPK,CTNS,TAX1BP3,EMC6,P2X5,ITGAE,GSG2,C17orf85,U6,CAMKK1,P2RX1,ATP2A3,CACNA1B,EHMT1,ARRDC1,ZMYND19,DPH7,MRPL41,PNPLA7,ENSCAFG00000019431,ENSCAFG00000029381,ENTPD8,NOXA1,EXD3,NRARP,TOR4A,NELFB,C9orf173,TUBB4B,FAM166A,…
CCB050227	chr8:61037750-69966650	Amplification	0.5091	200	TDP1,KCNK13,PSMC1,NRDE2,ENSCAFG00000032360,CALM1,TTC7B,ENSCAFG00000031748,SNORA11,RPS6KA5,GPR68,CCDC88C,SMEK1,5S_rRNA,U6,TMEM251,C14orf142,ENSCAFG00000017591,BTBD7,U6,7SK,UNC79,U6,PRIMA1,FAM181A,ASB2,ENSCAFG00000017617,OTUB2,DDX24,ENSCAFG00000017632,PPP4R4,SERPINA6,SERPINA1,SERPINA11,ENSCAFG00000017659,SERPINA9,SERPINA12,SERPINA4,SERPINA5,SERPINA3,GSC,U6,DICER1,CLMN,SYNE3,5S_rRNA,SCARNA13,GLRX5,U…
CCB050354	chr2:32213400-32215750	Amplification	0.6454	1	PITRM1
CCB050354	chr2:80725700-80748350	Amplification	0.6007	1	ARHGEF10L
CCB050354	chr4:4249000-4271750	Amplification	0.5497	1	LYST
CCB050354	chr4:57766000-57768300	Amplification	0.8186	1	FAT2
CCB050354	chr17:2239850-2307200	Amplification	0.5278	1	DCDC2C
CCB050354	chr23:8581950-8604600	Amplification	0.6679	1	SCN11A
CCB050354	chr33:13703900-13719600	Amplification	0.6961	1	MYH15
CCB050354	chr4:10980800-11387500	Amplification	0.866	2	BICC1,ENSCAFG00000012382
CCB050354	chr33:31341000-31360250	Amplification	0.573	2	LRRC15,CPN2
CCB050354	chr4:59459200-59580900	Amplification	0.513	4	ENSCAFG00000018286,cfa-mir-145,cfa-mir-143,IL17B
CCB050354	chr2:1320800-1772700	Amplification	0.5012	5	FZD8,ENSCAFG00000023176,CCNY,7SK,CREM
CCB050354	chr2:55236650-55920250	Amplification	0.5192	8	MAP1B,MRPS27,PTCD2,5S_rRNA,ZNF366,ENSCAFG00000031745,TNPO1,FCHO2
CCB050354	chr4:74862650-75322050	Amplification	0.5435	8	NPR3,5S_rRNA,ENSCAFG00000018879,ENSCAFG00000018881,ZFR,ENSCAFG00000027374,MTMR12,GOLPH3
CCB050354	chr4:71943650-74862350	Amplification	0.7323	28	GLAST,ENSCAFG00000029561,RANBP3L,ENSCAFG00000031830,SKP2,LMBRD2,ENSCAFG00000023144,ENSCAFG00000032039,CAPSL,IL7R,SPEF2,U6,PRLR,AGXT2,DNAJC21,BRIX1,RAD1,TTC23L,U6,RAI14,U6,ENSCAFG00000018825,AMACR,SLC45A2,RXFP3,ADAMTS12,TARS,NPR3
CCB050354	chr4:75351000-88273150	Amplification	0.7176	29	PDZD2,C5orf22,ENSCAFG00000031829,ENSCAFG00000018939,CDH6,ENSCAFG00000018956,U6,CDH9,ENSCAFG00000018980,7SK,CDH10,ENSCAFG00000017424,ENSCAFG00000019017,ENSCAFG00000019023,CDH12,ENSCAFG00000031957,CDH18,SNORA62,U2,7SK,RNF167,BASP1,FAM134B,MYO10,ZNF622,MARCH11,FBXL7,ENSCAFG00000019108,ANKH
CCB050354	chr4:69500-4248700	Amplification	0.6936	35	IFIT2,IFIT3,U4,IFIT1,IFIT5,ZNF248,ZNF25,ENSCAFG00000028519,ENSCAFG00000029103,ENSCAFG00000024143,U6,ZNF37A,CHRM3,ENSCAFG00000009985,ENSCAFG00000009991,ENSCAFG00000009998,ZP4,RYR2,7SK,ENSCAFG00000008063,SNORA25,U6,SNORA2,ENSCAFG00000010041,MTR,U6,ACTN2,HEATR1,LGALS8,EDARADD,ERO1LB,GPR137B,ENSCAFG00000030994,NID1,LYST
CCB050354	chr23:4141650-8581200	Amplification	0.5057	40	PDCD6IP,ENSCAFG00000030719,5S_rRNA,U6,ENSCAFG00000004734,U6,U4,ENSCAFG00000010012,ARPP21,cfa-mir-128-2,ENSCAFG00000004758,ENSCAFG00000026672,STAC,ENSCAFG00000026737,DCLK3,TRANK1,EPM2AIP1,MLH1,LRRFIP2,ENSCAFG00000029998,GOLGA4,ITGA9,cfa-mir-26a-1,VILL,PLCD1,DLEC1,ACAA1,MYD88,OXSR1,ENSCAFG00000031028,ENSCAFG00000032364,SLC22A13,SLC22A14,XYLB,ACVR2B,EXOG,RPS2,SCN5A,SCN10A,SCN11A
CCB050354	chr4:57768650-59458950	Amplification	0.6725	41	FAT2,SLC36A1,SLC36A2,SLC36A3,GM2A,ENSCAFG00000026627,CCDC69,U6,ANXA6,TNIP1,GPX3,ENSCAFG00000017961,ENSCAFG00000023257,ZNF300,U6,SMIM3,7SK,DCTN4,RBM22,MYOZ3,SYNPO,NDST1,RPS14,CD74,TCOF1,ARSI,CAMK2A,SLC6A7,CDX1,PDGFRB,CSF1R,HMGXB3,ENSCAFG00000032400,TIGD6,SLC26A2,PDE6A,PPARGC1B,cfa-mir-378,U6,ARHGEF37,ENSCAFG00000018286
CCB050354	chr4:11446750-19604000	Amplification	0.6615	45	PHYHIPL,FAM13C,SLC16A9,CCDC6,U6,ENSCAFG00000012458,ANK3,U6,CDK1,RHOBTB1,U2,GAPDH,ENSCAFG00000012971,TMEM26,5S_rRNA,C10orf107,ARID5B,RTKN2,ZNF365,ADO,EGR2,NRBF2,JMJD1C,ENSCAFG00000026634,7SK,REEP3,CTNNA3,ENSCAFG00000013264,LRRTM3,ENSCAFG00000024412,ENSCAFG00000013277,ENSCAFG00000006036,DNAJC12,ENSCAFG00000028988,HNRNPA1L2,SIRT1,ENSCAFG00000013319,HERC4,U6,5S_rRNA,MYPN,ATOH7,PBLD,HNRNPH3,RUFY2
CCB050354	chr33:13726650-18240200	Amplification	0.5037	46	MYH15,KIAA1524,DZIP3,7SK,TRAT1,GUCA1C,MORC1,ENSCAFG00000010327,ENSCAFG00000010331,ENSCAFG00000010335,PVRL3,CD96,ZBED2,PLCXD2,PHLDB2,ABHD10,TAGLN3,TMPRSS7,C3orf52,GCSAM,SLC9C1,ENSCAFG00000032420,ENSCAFG00000029117,CD200,ENSCAFG00000010477,BTLA,ENSCAFG00000010493,SLC35A5,CCDC80,ENSCAFG00000010546,ENSCAFG00000025131,GTPBP8,C3orf17,ENSCAFG00000028163,BOC,WDR52,SPICE1,SIDT1,KIAA2018,NAA50,ATP6V1A,GRAM…
CCB050354	chr4:4275550-10980450	Amplification	0.6742	66	LYST,ENSCAFG00000031911,GNG4,B3GALNT2,TBCE,GGPS1,ARID4B,RBM34,TOMM20,SNORA14,U6,ENSCAFG00000032166,IRF2BP2,TARBP1,COA6,SLC35F3,7SK,KCNK1,ENSCAFG00000011566,PCNXL2,NTPCR,5S_rRNA,ENSCAFG00000011616,SIPA1L2,DISC1,SNORA25,ENSCAFG00000030982,EGLN1,SNORD35,SPRTN,EXOC8,GNPAT,C1orf131,TRIM67,FAM89A,ARV1,TTC13,CAPN9,C1orf198,AGT,cfa-mir-1841,cfa-mir-1841,U6,PGBD5,GALNT2,ENSCAFG00000024420,URB2,TAF5L,ABCB1…
CCB050354	chr4:59581200-71687800	Amplification	0.665	99	IL17B,PCYOX1L,GRPEL2,AFAP1L1,ABLIM3,U6,SH3TC2,ADRB2,HTR4,FBXO38,SPINK9,SPINK7,GZMK,ESM1,ENSCAFG00000008488,ENSCAFG00000018385,ENSCAFG00000031454,SNX18,HSPB3,ENSCAFG00000002726,LITAF,ARL15,FST,ENSCAFG00000018410,ENSCAFG00000026642,ENSCAFG00000018414,ENSCAFG00000031509,MOCS2,ITGA2,ENSCAFG00000018434,ITGA1,U2,U6,ISL1,U6,U6,PARP8,U6,EMB,HCN1,U6,ENSCAFG00000018512,MRPS30,FGF10,SNORA54,U6,NNT,SNORA33,P…
CCB050354	chr4:19724800-57765800	Amplification	0.6697	336	SLC25A16,TET1,U6,5S_rRNA,CCAR1,U6,STOX1,DDX50,DDX21,KIAA1279,U4,SRGN,VPS26A,SUPV3L1,HKDC1,HK1,TACR2,TSPAN15,NEUROG3,C10orf35,COL13A1,5S_rRNA,H2AFY2,AIFM2,TYSND1,PPA1,ENSCAFG00000014038,LRRC20,EIF4EBP2,NODAL,PALD1,PRF1,ENSCAFG00000014078,ADAMTS14,TBATA,SGPL1,PCBD1,UNC5B,SLC29A3,ENSCAFG00000014229,U2,C10orf105,C10orf54,PSAP,U6,CHST3,SPOCK2,ASCC1,ANAPC16,DDIT4,DNAJB12,MICU1,U6,ENSCAFG00000014500,MCU…
OSU431895	chr13:10017000-10023000	Amplification	0.5342	1	PKHD1L1
OSU431895	chr7:12365100-12371250	Amplification	0.5386	1	PTPN14
OSU431895	chr13:58435300-58440950	Amplification	0.5417	1	TMPRSS11A
OSU431895	chr16:6344700-6351450	Amplification	0.5454	1	CLCN1
OSU431895	chr34:11295750-11300350	Amplification	0.5474	1	TERT
OSU431895	chr8:27340800-27357600	Amplification	0.5493	1	TRIM9
OSU431895	chr10:45370600-45374900	Amplification	0.5575	1	HAAO
OSU431895	chr15:8168500-8183050	Amplification	0.5726	1	CSMD2
OSU431895	chr37:14353200-14361200	Amplification	0.5807	1	NRP2
OSU431895	chr36:10308100-10318750	Amplification	0.7701	1	SCN3A
OSU431895	chr13:37467200-37469050	Amplification	0.9492	1	PLEC
OSU431895	chr22:48571700-48587350	Amplification	0.5304	2	FARP1,STK24
OSU431895	chr16:16489650-16522550	Amplification	0.537	2	ACTR3B,U6
OSU431895	chr7:6101100-6162800	Amplification	0.548	2	FCAMR,C1orf116
OSU431895	chr10:26004900-26034450	Amplification	0.5519	2	NPTXR,DNAL4
OSU431895	chr22:60977950-60981700	Amplification	0.5581	2	TMEM255B,GAS6
OSU431895	chr9:26459350-26469900	Amplification	0.5604	2	MYCBPAP,EPN3
OSU431895	chr34:18785700-18840750	Amplification	0.5732	2	ETV5,DGKG
OSU431895	chr7:43173400-43180600	Amplification	0.5938	2	SLC39A1,CRTC2
OSU431895	chr10:38061150-38082800	Amplification	0.6231	2	FHL2,C2orf49
OSU431895	chr4:62227650-62303450	Amplification	0.5052	3	ITGA2,ENSCAFG00000018434,ITGA1
OSU431895	chr7:57557250-57585800	Amplification	0.5268	3	ENSCAFG00000031963,U6,RNF125
OSU431895	chr8:43338250-43458900	Amplification	0.5862	3	ENSCAFG00000016579,U6,KIAA0247
OSU431895	chr4:32475550-32498600	Amplification	0.8189	3	LRIT1,ENSCAFG00000015927,RGR
OSU431895	chr7:7049100-8257550	Amplification	0.5814	8	PLXNA2,ENSCAFG00000026785,ENSCAFG00000026765,ENSCAFG00000010678,U6,ENSCAFG00000011883,cfa-mir-205,CAMK1G
OSU431895	chr36:10329750-11130100	Amplification	0.6132	8	SCN3A,SCN2A,U6,CSRNP3,GALNT3,U6,TTC21B,SCN1A
OSU431895	chr26:35699700-38917000	Deletion	-1.3683	29	DKK1,PRKG1,CSTF2T,ENSCAFG00000023425,A1CF,ENSCAFG00000015602,U6,SGMS1,7SK,MINPP1,PAPSS2,ATAD1,ENSCAFG00000029370,ENSCAFG00000031699,PTEN,RNLS,ENSCAFG00000032091,LIPJ,LIPF,LIPK,LIPM,ANKRD22,ENSCAFG00000029090,ENSCAFG00000030844,STAMBPL1,ACTC,FAS,CH25H,LIPA
OSU431895	chr36:11157950-15533500	Amplification	0.6229	37	SCN1A,SCN9A,SCN7A,ENSCAFG00000011673,XIRP2,ENSCAFG00000011707,B3GALT1,STK39,CERS6,NOSTRIN,SPC25,G6PC2,ABCB11,DHRS9,ENSCAFG00000031746,LRP2,ENSCAFG00000012275,KLHL41,U6,FASTKD1,PPIG,CCDC173,PHOSPHO2,KLHL23,ENSCAFG00000029231,SSB,METTL5,UBR3,MYO3B,ENSCAFG00000012501,SP5,ERICH2,GAD1,ENSCAFG00000032252,U6,GORASP2,TLK1
OSU431895	chr4:62303700-68608100	Amplification	0.6557	43	ITGA1,U2,U6,ISL1,U6,U6,PARP8,U6,EMB,HCN1,U6,ENSCAFG00000018512,MRPS30,FGF10,SNORA54,U6,NNT,SNORA33,PAIP1,ENSCAFG00000031903,C5orf34,5S_rRNA,C5orf28,CCL28,ENSCAFG00000018572,ENSCAFG00000030435,NIM1K,ZNF131,SEPP1,CCDC152,GHR,ENSCAFG00000023056,FBXO4,C5orf51,EEF1A1,OXCT1,PLCXD3,C6,MROH2B,C7,CARD6,SNORD72,PRKAA1
OSU431895	chr36:21231900-30677250	Amplification	0.6431	53	AGPS,ENSCAFG00000013536,ENSCAFG00000029150,PDE11A,RBM45,U6,SNORD112,ENSCAFG00000028429,OSBPL6,DFNB59,PRKRA,FKBP7,PLEKHA3,TTN,ENSCAFG00000028776,CCDC141,SESTD1,ZNF385B,CWC22,U6,UBE2E3,ITGA4,CERKL,ENSCAFG00000014194,SSFA2,PPP1R1C,PDE1A,SNORD22,ENSCAFG00000030296,Y_RNA,DNAJC10,FRZB,NCKAP1,U6,DUSP19,TIGD1,NUP35,STK19,ZNF804A,U6,FSIP2,ZC3H15,ITGAV,FAM171B,ZSWIM2,CALCRL,TFPI,7SK,7SK,GULP1,U6,COL3A1,COL…
OSU431895	chr36:15542950-21175300	Amplification	0.6498	55	TLK1,ENSCAFG00000026775,U6,METTL8,DCAF17,CYBRD1,DYNC1I2,SLC25A12,HAT1,ENSCAFG00000012900,METAP1D,U6,DLX1,DLX2,SCARNA17,SCARNA18,ITGA6,ENSCAFG00000013060,RAPGEF4,ENSCAFG00000013140,ENSCAFG00000013158,7SK,SP3,OLA1,SP9,GPR155,SCRN3,U6,WIPF1,CHRNA1,CHN1,ATF2,ENSCAFG00000013366,U6,ENSCAFG00000013374,U1,ENSCAFG00000030714,KIAA1715,ENSCAFG00000013399,EVX2,HOXD12,HOXD11,HOXD10,HOXD8,cfa-mir-10b,HOXD4,HOX…
OSU431895	chr36:698800-10307250	Amplification	0.6344	56	GALNT13,HSPD1,5S_rRNA,KCNJ3,ENSCAFG00000009188,U6,ENSCAFG00000029956,NR4A2,GPD2,ENSCAFG00000009244,ENSCAFG00000009250,ENSCAFG00000009252,GALNT5,ERMN,CYTIP,ACVR1C,ACVR1,U6,U6,CCDC148,5S_rRNA,PKP4,DAPL1,TANC1,WDSUB1,ENSCAFG00000009377,BAZ2B,ENSCAFG00000013858,5S_rRNA,MARCH7,CD302,ENSCAFG00000023972,PLA2R1,ITGB6,RBMS1,TANK,PSMD14,5S_rRNA,TBR1,SLC4A10,DPP4,GLP-1,FAP,IFIH1,GCA,KCNH7,ENSCAFG00000010515…
OSU431895	chr13:58443050-62934400	Amplification	0.7204	60	TMPRSS11A,ENSCAFG00000032430,TMPRSS11F,TMPRSS11B,TMPRSS11E,U6,YTHDC1,ENSCAFG00000030367,ENSCAFG00000002828,ENSCAFG00000029376,UGT2B31,UGT2A3,ENSCAFG00000024836,ENSCAFG00000002857,SULT1B1,ENSCAFG00000002873,ENSCAFG00000002875,SULT1E1,CSN1S1,CSN2,C4orf40,ODAM,CSN3,ENSCAFG00000028973,ENSCAFG00000002890,CABS1,ENSCAFG00000029608,AMTN,AMBN,ENAM,IGJ,UTP3,RUFY3,GRSF1,SNORA62,MOB1B,DCK,ENSCAFG00000002934,…
OSU431895	chr13:92500-10016800	Amplification	0.726	76	LAPTM4B,MATN2,ENSCAFG00000031952,SNORA72,C8orf47,ENSCAFG00000030250,POP1,NIPAL2,ENSCAFG00000018581,KCNS2,STK3,U6,OSR2,VPS13B,U6,cfa-mir-599,cfa-mir-875,RGS22,ENSCAFG00000000532,FBXO43,ENSCAFG00000031661,SPAG1,RNF19A,5S_rRNA,ANKRD46,SNX31,PABPC1,YWHAZ,Y_RNA,ZNF706,Y_RNA,GRHL2,ENSCAFG00000030800,NCALD,ENSCAFG00000025578,ENSCAFG00000000596,RRM2B,UBR5,ENSCAFG00000000632,ENSCAFG00000030010,SNRPD2,ODF1…
OSU431895	chr4:68648500-88273150	Amplification	0.6472	90	TTC33,PTGER4,ENSCAFG00000001877,DAB2,C9,FYB,RICTOR,OSMR,ENSCAFG00000018652,LIFR,U2,EGFLAM,ENSCAFG00000018671,U6,GDNF,WDR70,ENSCAFG00000018679,SNORA67,SNORD22,NUP155,U6,SNORA30,7SK,U6,C5orf42,NIPBL,GLAST,ENSCAFG00000029561,RANBP3L,ENSCAFG00000031830,SKP2,LMBRD2,ENSCAFG00000023144,ENSCAFG00000032039,CAPSL,IL7R,SPEF2,U6,PRLR,AGXT2,DNAJC21,BRIX1,RAD1,TTC23L,U6,RAI14,U6,ENSCAFG00000018825,AMACR,SLC45A…
OSU431895	chr4:32584700-47752750	Amplification	0.6863	133	CCSER2,U6,GRID1,ENSCAFG00000031941,cfa-mir-346,WAPAL,OPN4,LDB3,BMPR1A,MMRN2,ENSCAFG00000024229,SNCG,ENSCAFG00000016093,ENSCAFG00000016095,ENSCAFG00000032460,FAM35A,SYT15,GPRIN2,NPY4R,ENSCAFG00000016149,ANTXRL,ZNF488,RBP3,GDF2,GDF10,ENSCAFG00000023521,DCP2,U6,MCC,FAM193B,GRK6,DDX41,DOK3,ENSCAFG00000016333,DBN1,PRR7,F12,PFN3,SLC34A1,RGS14,LMAN2,MXD3,PRELID1,RAB24,NSD1,FGFR4,ZNF346,ENSCAFG0000001654…
OSU431895	chr4:47781300-62225000	Amplification	0.6927	142	HMMR,NUDCD2,CCNG1,ENSCAFG00000017212,5S_rRNA,U6,GABRG2,ENSCAFG00000017236,GABRA1,ENSCAFG00000017239,GABRA6,GABRB2,ATP10B,cfa-mir-146a,ENSCAFG00000017264,SLU7,C5orf54,U6,C1QTNF2,ENSCAFG00000017274,FABP6,ENSCAFG00000017689,U4,PWWP2A,TTC1,ADRA1B,ENSCAFG00000029942,IL12B,UBLCP1,RNF145,EBF1,U6,CLINT1,U6,THG1L,SOX30,ADAM19,NIPAL4,CYFIP2,FNDC9,U6,ITK,FAM71B,MED7,HAVCR2,HAVCR1,TIMD4,SGCD,ENSCAFG000000302…
OSU431895	chr13:37469800-58435050	Amplification	0.7574	173	PLEC,ENSCAFG00000030933,ENSCAFG00000030148,GRINA,SPATC1,ENSCAFG00000032288,OPLAH,EXOSC4,GPAA1,SHARPIN,CYC1,ENSCAFG00000029569,ENSCAFG00000001540,ENSCAFG00000032656,ENSCAFG00000001541,ENSCAFG00000001542,MROH1,ENSCAFG00000025328,VPS28,ENSCAFG00000001554,ENSCAFG00000001559,HSF1,DGAT1,TMEM249,ENSCAFG00000001588,FBXL6,ADCK5,CPSF1,SLC39A4,TONSL,CYHR1,KIFC2,FOXH1,PPP1R16A,GPT,MFSD3,RECQL4,LRRC24,LRRC14,…
OSU431895	chr13:10023450-37467000	Amplification	0.7649	182	PKHD1L1,EBAG9,SYBU,SNORD112,ENSCAFG00000000743,KCNV1,U6,ENSCAFG00000020173,ENSCAFG00000000747,ENSCAFG00000000749,ENSCAFG00000028960,CSMD3,ENSCAFG00000028131,U6,ENSCAFG00000002560,MGST3,ENSCAFG00000030964,U6,ENSCAFG00000000805,U6,TRPS1,ENSCAFG00000028713,ENSCAFG00000027644,EIF3H,UTP23,RAD21,ENSCAFG00000029199,AARD,SLC30A8,MED30,EXT1,SAMD12,U6,TNFRSF11B,ENSCAFG00000000835,COLEC10,MAL2,NOV,ENPP2,TAF…
OSU431895	chr4:69700-32472150	Amplification	0.6663	278	IFIT2,IFIT3,U4,IFIT1,IFIT5,ZNF248,ZNF25,ENSCAFG00000028519,ENSCAFG00000029103,ENSCAFG00000024143,U6,ZNF37A,CHRM3,ENSCAFG00000009985,ENSCAFG00000009991,ENSCAFG00000009998,ZP4,RYR2,7SK,ENSCAFG00000008063,SNORA25,U6,SNORA2,ENSCAFG00000010041,MTR,U6,ACTN2,HEATR1,LGALS8,EDARADD,ERO1LB,GPR137B,ENSCAFG00000030994,NID1,LYST,ENSCAFG00000031911,GNG4,B3GALNT2,TBCE,GGPS1,ARID4B,RBM34,TOMM20,SNORA14,U6,ENSCAF…

## Sheet: Supplementary Table 6
Supplementary Table 6. Somatic coding structural variants identified by exome sequencing of primary canine lung cancers.
Patient ID	Genomic coordinates region 1	Genomic coordinates region 2	Rearrangement type	Gene(s) affected
CCB010387	chr23:44360546	chr17:63950184	Translocation	WWTR1-ATP5F1
CCB050354	chrX:103308454	chr15:59537883	Translocation	MBNL3-.
OSU431895	chr9:12124378	chr9:12531743	Inversion	TEX2-PECAM1

## Sheet: Supplementary Table 7
Supplementary Table 7. Canine genomic regions covered by custom amplicon panel.
Gene symbol	Chromosomal region
ABL1	chr9:53132787-53132980
ABL1	chr9:53131795-53131993
ABL1	chr9:53131719-53131931
ABL1	chr9:53129710-53129941
ABL1	chr9:53141626-53141773
ABL1	chr9:53141666-53141807
AKT1	chr8:72322531-72322699
AKT1	chr8:72326350-72326560
ALK	chr17:23025511-23025720
ALK	chr17:23035562-23035750
APC	chr3:258857-259033
APC	chr3:258218-258432
APC	chr3:257603-257802
APC	chr3:257493-257662
APC	chr3:257377-257575
APC	chr3:257323-257484
APC	chr3:257192-257389
APC	chr3:257095-257294
APC	chr3:257006-257177
APC	chr3:256898-257090
APC	chr3:256847-257042
ATM	chr5:24271300-24271494
ATM	chr5:24267485-24267645
ATM	chr5:24227983-24228182
ATM	chr5:24226702-24226901
ATM	chr5:24225744-24225929
ATM	chr5:24219490-24219708
ATM	chr5:24272535-24272754
ATM	chr5:24205249-24205465
ATM	chr5:24205240-24205437
ATM	chr5:24201430-24201627
ATM	chr5:24199499-24199678
ATM	chr5:24198654-24198849
ATM	chr5:24191423-24191602
ATM	chr5:24187574-24187742
ATM	chr5:24182536-24182771
ATM	chr5:24182478-24182675
ATM	chr5:24262108-24262315
ATM	chr5:24248285-24248459
BRAF	chr16:8296161-8296342
BRAF	chr16:8274236-8274435
BCL2	chr1:13734560-13734773
BCL6	chr34:20115524-20115716
PTPRJ	chr18:41635247-41635349
PTPRJ	chr18:41610376-41610575
PTPRJ	chr18:41608739-41608930
PTPRJ	chr18:41608842-41609026
PTPRJ	chr18:41608498-41608684
PTPRJ	chr18:41607194-41607362
PTPRJ	chr18:41605254-41605452
PTPRJ	chr18:41604588-41604785
PTPRJ	chr18:41602799-41602982
PTPRJ	chr18:41599896-41600094
PTPRJ	chr18:41599639-41599857
PTPRJ	chr18:41596160-41596359
PTPRJ	chr18:41592490-41592700
PTPRJ	chr18:41591115-41591314
PTPRJ	chr18:41587706-41587924
PTPRJ	chr18:41632742-41632920
PTPRJ	chr18:41632835-41633029
PTPRJ	chr18:41629887-41630079
PTPRJ	chr18:41630032-41630209
PTPRJ	chr18:41628351-41628541
PTPRJ	chr18:41628459-41628646
PTPRJ	chr18:41624925-41625123
PTPRJ	chr18:41625081-41625280
PTPRJ	chr18:41622247-41622435
PTPRJ	chr18:41622397-41622596
PTPRJ	chr18:41617533-41617716
PTPRJ	chr18:41617662-41617861
PTPRJ	chr18:41616514-41616733
PTPRJ	chr18:41616636-41616885
PTPRJ	chr18:41614210-41614408
PTPRJ	chr18:41614356-41614555
CDH1	chr5:80784506-80784734
CDH1	chr5:80776432-80776601
CDH1	chr5:80774217-80774415
CDKN2A	chr11:41225734-41225940
CDKN2A	chr11:41225847-41226091
CDKN2A	chr11:41225923-41226135
CSF1R	chr4:59009763-59009961
CSF1R	chr4:58991781-58991961
CTNNB1	chr23:10560210-10560409
DDR2	chr38:20031670-20031800
DDR2	chr38:20018886-20019053
DDR2	chr38:20011852-20012021
DDR2	chr38:20015205-20015318
DDR2	chr38:20037000-20037174
EGFR	chr18:5984689-5984867
EGFR	chr18:6009937-6010119
EGFR	chr18:6015506-6015703
EGFR	chr18:6016237-6016419
EGFR	chr18:6022048-6022235
EGFR	chr18:6022102-6022321
EGFR	chr18:6031188-6031372
EGFR	chr18:6015468-6015615
EGFR	chr18:6032170-6032301
EGFR	chr18:6036127-6036259
ERBB2	chr9:22764275-22764455
ERBB2	chr9:22763963-22764154
ERBB2	chr9:22763598-22763819
ERBB2	chr9:22773787-22773946
ERBB2	chr9:22763320-22763513
ERBB2	chr9:22765031-22765155
ERBB4	chr37:19076188-19076407
ERBB4	chr37:19283169-19283364
ERBB4	chr37:19323504-19323674
ERBB4	chr37:19325350-19325532
ERBB4	chr37:19329168-19329367
ERBB4	chr37:19332359-19332524
ERBB4	chr37:19397751-19397948
ERBB4	chr37:19542733-19542967
ERBB4	chr37:19313045-19313157
ERBB4	chr37:19289223-19289313
ERBB4	chr37:19289294-19289464
EZH2	chr16:1987314-1987557
FBXW7	chr15:50190724-50190883
FBXW7	chr15:50192437-50192618
FBXW7	chr15:50194544-50194703
FBXW7	chr15:50194506-50194656
FBXW7	chr15:50195961-50196180
FBXW7	chr15:50204776-50204983
FGFR1	chr16:27068305-27068524
FGFR1	chr16:27064078-27064262
FGFR2	chr28:31322761-31322958
FGFR2	chr28:31338175-31338374
FGFR2	chr28:31342907-31343177
FGFR2	chr28:31343056-31343224
FGFR2	chr28:31313535-31313691
FGFR2	chr28:31341774-31341866
FGFR3	chr3:62316073-62316318
FGFR3	chr3:62313411-62313598
FGFR3	chr3:62311495-62311744
FGFR3	chr3:62311181-62311389
FGFR3	chr3:62310633-62310841
FLT3	chr25:11658010-11658206
FLT3	chr25:11650244-11650417
FLT3	chr25:11645983-11646179
FLT3	chr25:11644347-11644540
FLT3	chr25:11651048-11651257
FLT3	chr25:11650091-11650285
FRK	chr12:71663010-71663169
GNAQ	chr1:80927708-80927894
GNAQ	chr1:80927595-80927788
GNAQ	chr1:80914802-80914992
GNAQ	chr1:80914684-80914869
GNAQ	chr1:80853899-80854117
GNAQ	chr1:80853784-80853992
GNAQ	chr1:80851113-80851319
GNAQ	chr1:80851055-80851212
GNAS	chr24:43656666-43656897
GNAS	chr24:43656737-43656956
HNF1A	chr26:16818019-16818204
HNF1A	chr26:16818585-16818780
HRAS	chr18:25644183-25644366
HRAS	chr18:25644512-25644711
IDH1	chr37:16524257-16524455
IDH2	chr3:53075018-53075197
ITK	chr4:52913310-52913489
JAK2	chr1:93416438-93416687
JAK3	chr20:45061934-45062125
JAK4	chr20:45060022-45060184
JAK5	chr20:45054387-45054604
KDR	chr13:47442807-47443005
KDR	chr13:47442922-47443121
KDR	chr13:47450231-47450424
KDR	chr13:47451501-47451693
KDR	chr13:47456971-47457187
KDR	chr13:47458307-47458469
KDR	chr13:47468134-47468322
KDR	chr13:47472965-47473163
KDR	chr13:47473656-47473869
KIT	chr13:47144443-47144632
KIT	chr13:47178311-47178450
KIT	chr13:47178426-47178639
KIT	chr13:47178530-47178716
KIT	chr13:47176964-47177163
KIT	chr13:47179068-47179254
KIT	chr13:47180332-47180521
KIT	chr13:47182346-47182529
KIT	chr13:47184222-47184406
KIT	chr13:47187866-47188075
KIT	chr13:47187759-47187888
KRAS	chr27:22279727-22279909
KRAS	chr27:22277814-22278013
KRAS	chr27:22261748-22261919
MET	chr14:55626818-55627017
MET	chr14:55627435-55627650
MET	chr14:55677379-55677569
MET	chr14:55685409-55685605
MET	chr14:55691158-55691383
MET	chr14:55699134-55699333
MLH1	chr23:6914204-6914398
MTOR	chr2:84924877-84924999
MTOR	chr2:84932668-84932872
MTOR	chr2:84927931-84928072
MTOR	chr2:84935761-84935930
MTOR	chr2:84927484-84927631
NOTCH1	chr9:49016900-49017088
NOTCH1	chr9:49010843-49011051
NOTCH1	chr9:49010128-49010283
NPM1	chr4:40756680-40756873
NRAS	chr17:52413400-52413574
NRAS	chr17:52415785-52415961
NRAS	chr17:52418025-52418207
PDGFRA	chr13:46755130-46755319
PDGFRA	chr13:46758112-46758261
PDGFRA	chr13:46758431-46758605
PDGFRA	chr13:46762522-46762720
PIK3CA	chr34:12647939-12648113
PIK3CA	chr34:12648039-12648254
PIK3CA	chr34:12651012-12651167
PIK3CA	chr34:12659946-12660166
PIK3CA	chr34:12660627-12660824
PIK3CA	chr34:12660735-12660974
PIK3CA	chr34:12662924-12663096
PIK3CA	chr34:12666251-12666443
PIK3CA	chr34:12674167-12674366
PIK3CA	chr34:12675544-12675768
PIK3CA	chr34:12675591-12675825
PTEN	chr26:37878229-37878397
PTEN	chr26:37885976-37886175
PTEN	chr26:37900453-37900622
PTEN	chr26:37906248-37906447
PTEN	chr26:37906397-37906589
PTEN	chr26:37906499-37906671
PTEN	chr26:37909934-37910153
PTEN	chr26:37909981-37910174
PTEN	chr26:37910002-37910174
PTPN11	chr26:10014538-10014695
PTPN11	chr26:10052693-10052873
RB1	chr22:3173653-3173838
RB1	chr22:3163154-3163332
RB1	chr22:3150317-3150489
RB1	chr22:3139920-3140083
RB1	chr22:3086935-3087134
RB1	chr22:3074403-3074621
RB1	chr22:3073714-3073938
RB1	chr22:3151283-3151502
RB1	chr22:3141437-3141649
RB1	chr22:3080014-3080184
RET	chr28:3963179-3963336
RET	chr28:3962219-3962405
RET	chr28:3957290-3957458
RET	chr28:3955803-3956014
RET	chr28:3953762-3953961
SMAD4	chr1:23912698-23912906
SMAD4	chr1:23912117-23912330
SMAD4	chr1:23907338-23907536
SMAD4	chr1:23903927-23904114
SMAD4	chr1:23902156-23902353
SMAD4	chr1:23894364-23894550
SMAD4	chr1:23893105-23893301
SMAD4	chr1:23884149-23884355
SMAD4	chr1:23882497-23882684
SMARCB1	chr26:28724265-28724461
SMARCB1	chr26:28718341-28718526
SMARCB1	chr26:28716112-28716322
SMARCB1	chr26:28692815-28693023
SMO	chr14:7525791-7525990
SMO	chr14:7524837-7525024
SMO	chr14:7524444-7524653
SMO	chr14:7521708-7521886
SMO	chr14:7520567-7520757
SRC	chr24:26017664-26017849
STK11	chr20:57578759-57578958
STK11	chr20:57566739-57566975
STK11	chr20:57566801-57567028
STK11	chr20:57565779-57565960
STK11	chr20:57563316-57563508
TP53	chr5:32562056-32562255
TP53	chr5:32562928-32563119
TP53	chr5:32563278-32563472
TP53	chr5:32563619-32563858
TP53	chr5:32563769-32563968
TP53	chr5:32563888-32564137
TP53	chr5:32564559-32564757
TP53	chr5:32565057-32565252
VHL	chr20:8210831-8211067
VHL	chr20:8209613-8209812
VHL	chr20:8206929-8207144

## Sheet: Supplementary Table 8
Supplementary Table 8. Sequencing metrics for primary canine lung cancer amplicon analysis.
Number of amplicons	281
Number of genes	53
Number of amplicons passing threshold	264
Median sample depth (range)	158 (64 - 19640)
Median amplicon depth (range)	1989 (1 - 9466 )

## Sheet: Supplementary Table 9
Supplementary Table 9. Somatic coding SNVs identified by panel sequencing of primary canine lung cancers.
Patient ID	Tumor Type	Gene symbol	Transcript accession	Nucleotide (genomic)	rs ID (dbSNP151)	Nucleotide (cDNA)	Amino acid (protein)	Mutation type	% mutant reads
BACA	cPAC	CDKN2A	ENSCAFT00000002623.3	chr11:41225906C>T	.	c.148G>A	p.Gly50Arg	Missense variant	0.924883
CCB010120	cPAC	ERBB2	ENSCAFT00000025936.3	chr9:22765127A>T	.	c.1976T>A	p.Val659Glu	Missense variant	0.337844
CCB010387	cPAC	ERBB2	ENSCAFT00000025936.3	chr9:22765127A>T	.	c.1976T>A	p.Val659Glu	Missense variant	0.467095
CCB010387	cPAC	KDR	ENSCAFT00000003300.3	chr13:47443084C>T	.	c.3846-1G>A	.	Splice acceptor variant	0.432012
CCB020051	cPAC	ATM	ENSCAFT00000023032.4	chr5:24205342T>C	.	c.7414A>G	p.Lys2472Glu	Missense variant	0.340877
CCB020051	cPAC	ERBB2	ENSCAFT00000025936.3	chr9:22765127A>T	.	c.1976T>A	p.Val659Glu	Missense variant	0.439616
CCB020198	cPAC	ERBB2	ENSCAFT00000025936.3	chr9:22765127A>T	.	c.1976T>A	p.Val659Glu	Missense variant	0.340724
CCB020198	cPAC	PTEN	ENSCAFT00000024821.3	chr26:37906437G>T	.	c.688G>T	p.Asp230Tyr	Missense variant	0.279161
CCB020245	cPAC	HNF1A	ENSCAFT00000016677.2	chr26:16818740C>T	.	c.814C>T	p.Arg272Cys	Missense variant	0.223732
CCB020251	cPAC	PTEN	ENSCAFT00000024821.3	chr26:37906431T>C	.	c.682T>C	p.Cys228Arg	Missense variant	0.211559
CCB020251	cPAC	SMAD4	ENSCAFT00000000266.3	chr1:23894419T>C	.	c.1052A>G	p.Asp351Gly	Missense variant	0.125342
CCB040005	cPAC	AKT1	ENSCAFT00000029177.3	chr8:72326373T>C	.	c.157A>G	p.Asn53Asp	Missense variant	0.245856
CCB040005	cPAC	ERBB2	ENSCAFT00000025936.3	chr9:22765127A>T	.	c.1976T>A	p.Val659Glu	Missense variant	0.348301
CCB040068	cPAC	ERBB2	ENSCAFT00000025936.3	chr9:22765127A>T	.	c.1976T>A	p.Val659Glu	Missense variant	0.339726
CCB040149	cPAC	ERBB2	ENSCAFT00000025936.3	chr9:22765127A>T	.	c.1976T>A	p.Val659Glu	Missense variant	0.222609
CCB040149	cPAC	TP53	ENSCAFT00000026465.3	chr5:32564629C>T	.	c.280G>A	p.Gly94Ser	Missense variant	0.396329
CCB040231	cPAC	ERBB2	ENSCAFT00000025936.3	chr9:22765127A>T	.	c.1976T>A	p.Val659Glu	Missense variant	0.202646
CCB050243	cPAC	ERBB2	ENSCAFT00000025936.3	chr9:22765127A>T	.	c.1976T>A	p.Val659Glu	Missense variant	0.11299
CCB050260	cPAC	ERBB2	ENSCAFT00000025936.3	chr9:22765127A>T	.	c.1976T>A	p.Val659Glu	Missense variant	0.10028
CCB050342	cPAC	TP53	ENSCAFT00000026465.3	chr5:32564027G>A	.	c.380C>T	p.Ala127Val	Missense variant	0.122758
CCB050345	cPAC	ERBB2	ENSCAFT00000025936.3	chr9:22765127A>T	.	c.1976T>A	p.Val659Glu	Missense variant	0.305263
CCB050350	cPAC	KRAS	ENSCAFT00000010525.3	chr27:22261798G>T	.	c.35G>T	p.Gly12Val	Missense variant	0.298387
CCB050354	cPAC	ERBB2	ENSCAFT00000025936.3	chr9:22765077T>C	.	c.2026A>G	p.Lys676Glu	Missense variant	0.3691
CCB050356	cPAC	TP53	ENSCAFT00000026465.3	chr5:32563074G>A	.	c.769C>T	p.Arg257Cys	Missense variant	0.48829
CCB050362	cPAC	ERBB2	ENSCAFT00000025936.3	chr9:22765127A>T	.	c.1976T>A	p.Val659Glu	Missense variant	0.105536
CCB050363	cPAC	APC	ENSCAFT00000011749.3	chr3:256988T>A	.	c.2915A>T	p.Glu972Val	Missense variant	0.334135
CCB050363	cPAC	FGFR1	ENSCAFT00000009709.3	chr16:27068444G>A	.	c.749G>A	p.Arg250Gln	Missense variant	0.246637
CCB050363	cPAC	FGFR2	ENSCAFT00000009748.4	chr28:31343109T>C	.	c.862A>G	p.Thr288Ala	Missense variant	0.255924
CCB060040	cPAC	PIK3CA	ENSCAFT00000017863.3	chr34:12675674A>T	.	c.3140A>T	p.His1047Leu	Missense variant	0.204762
CCB060143	cPAC	TP53	ENSCAFT00000026465.3	chr5:32563916C>T	rs851387419	c.491G>A	p.Arg164His	Missense variant	0.554204
CCB060156	cPAC	ERBB2	ENSCAFT00000025936.3	chr9:22765127A>T	.	c.1976T>A	p.Val659Glu	Missense variant	0.155716
CCB060156	cPAC	TP53	ENSCAFT00000026465.3	chr5:32563971C>A	.	c.436G>T	p.Val146Phe	Missense variant	0.34365
CCB070114	cPAC	ERBB2	ENSCAFT00000025936.3	chr9:22765127A>T	.	c.1976T>A	p.Val659Glu	Missense variant	0.185025
CCB070142	cPAC	VHL	ENSCAFT00000046552.2	chr20:8210949A>G	.	c.334T>C	p.Tyr112His	Missense variant	0.264574
CCB070294	cPAC	ERBB2	ENSCAFT00000025936.3	chr9:22765127A>T	.	c.1976T>A	p.Val659Glu	Missense variant	0.0942385
CCB070294	cPAC	SMAD4	ENSCAFT00000000266.3	chr1:23882575C>A	.	c.1572G>T	p.Trp524Cys	Missense variant	0.192881
CCB070295	cPAC	ERBB2	ENSCAFT00000025936.3	chr9:22765127A>T	.	c.1976T>A	p.Val659Glu	Missense variant	0.407774
CCB070295	cPAC	TP53	ENSCAFT00000026465.3	chr5:32563388C>T	rs851620436	c.716G>A	p.Arg239Gln	Missense variant	0.575893
CLAC	cPAC	TP53	ENSCAFT00000026465.3	chr5:32563028C>T	rs852440243	c.815G>A	p.Arg272His	Missense variant	0.994547
OSU361939	cPAC	ERBB2	ENSCAFT00000025936.3	chr9:22765127A>T	.	c.1976T>A	p.Val659Glu	Missense variant	0.388359
OSU381645	cPAC	KRAS	ENSCAFT00000010525.3	chr27:22261798G>T	.	c.35G>T	p.Gly12Val	Missense variant	0.568389
OSU388285	cPAC	ERBB2	ENSCAFT00000025936.3	chr9:22765127A>T	.	c.1976T>A	p.Val659Glu	Missense variant	0.170159
OSU389339	cPAC	ERBB2	ENSCAFT00000025936.3	chr9:22765127A>T	.	c.1976T>A	p.Val659Glu	Missense variant	0.477337
OSU389339	cPAC	PTEN	ENSCAFT00000024821.3	chr26:37906323C>T	.	c.574C>T	p.Gln192*	Stop-gained variant	0.231583
OSU415281	cPAC	HRAS	ENSCAFT00000048281.1	chr18:25644252A>G	.	c.233T>C	p.Phe78Ser	Missense variant	0.208825
OSU419040	cPAC	CSF1R	ENSCAFT00000028942.3	chr4:58991931A>G	.	c.953A>G	p.Lys318Arg	Missense variant	0.245715
OSU419040	cPAC	ERBB2	ENSCAFT00000025936.3	chr9:22765113C>T	.	c.1990G>A	p.Ala664Thr	Missense variant	0.179392
OSU419040	cPAC	ERBB2	ENSCAFT00000025936.3	chr9:22765127A>T	.	c.1976T>A	p.Val659Glu	Missense variant	0.083874
OSU419040	cPAC	VHL	ENSCAFT00000046552.2	chr20:8210966C>T	.	c.317G>A	p.Gly106Asp	Missense variant	0.286311
OSU424354	cPAC	ERBB2	ENSCAFT00000025936.3	chr9:22765127A>T	.	c.1976T>A	p.Val659Glu	Missense variant	0.0851937
OSU428073	cPAC	ERBB2	ENSCAFT00000025936.3	chr9:22765127A>T	.	c.1976T>A	p.Val659Glu	Missense variant	0.178118
OSU429271	cPAC	TP53	ENSCAFT00000026465.3	chr5:32563389G>C	rs852661628	c.715C>G	p.Arg239Gly	Missense variant	0.633543
OSUK9PADSnickers	cPAC	KRAS	ENSCAFT00000010525.3	chr27:22261798G>A	.	c.35G>A	p.Gly12Asp	Missense variant	0.733962
OSUK9PADSnickers	cPAC	SMARCB1	ENSCAFT00000022399.3	chr26:28716263C>T	.	c.628G>A	p.Glu210Lys	Missense variant	0.304515
OSUK9PADSnickers	cPAC	TP53	ENSCAFT00000026465.3	chr5:32563077C>A	.	c.766G>T	p.Gly256*	Stop-gained variant	0.984268
OSUK9PAPADOscar	cPAC	ERBB2	ENSCAFT00000025936.3	chr9:22765127A>T	.	c.1976T>A	p.Val659Glu	Missense variant	0.150199
OSUK9PAPADOscar	cPAC	SMAD4	ENSCAFT00000000266.3	chr1:23894420C>A	.	c.1051G>T	p.Asp351Tyr	Missense variant	0.296807
OSUK9PAPADRex	cPAC	ERBB2	ENSCAFT00000025936.3	chr9:22765127A>T	.	c.1976T>A	p.Val659Glu	Missense variant	0.519104
OSUK9PAPADRex	cPAC	SMAD4	ENSCAFT00000000266.3	chr1:23894420C>A	.	c.1051G>T	p.Asp351Tyr	Missense variant	0.992685
CCB010105	cPASC	KRAS	ENSCAFT00000010525.3	chr27:22277969C>A	.	c.181C>A	p.Gln61Lys	Missense variant	0.294026
CCB010105	cPASC	TP53	ENSCAFT00000026465.3	chr5:32563968G>A	.	c.439C>T	p.Arg147Cys	Missense variant	0.219602
CCB040011	cPASC	EGFR	ENSCAFT00000005575.3	chr18:6016365G>A	.	c.2176G>A	p.Ala726Thr	Missense variant	0.234334
CCB040011	cPASC	MET	ENSCAFT00000049462.2	chr14:55699187A>G	.	c.3805A>G	p.Met1269Val	Missense variant	0.34489
CCB040011	cPASC	PTPRJ	ENSCAFT00000013154.3	chr18:41608559T>C	.	c.2527A>G	p.Ser843Gly	Missense variant	0.268801
CCB040385	cPASC	PTEN	ENSCAFT00000024821.3	chr26:37910052T>G	.	c.893T>G	p.Leu298*	Stop-gained variant	0.594595
OSU422557	cPASC	HRAS	ENSCAFT00000048281.1	chr18:25644303T>A	.	c.182A>T	p.Gln61Leu	Missense variant	0.113376
OSU422557	cPASC	KIT	ENSCAFT00000049830.2	chr13:47187859A>G	.	c.2482-4A>G	.	Splice region variant	0.232961
OSUK9PADSQ	cPASC	PTEN	ENSCAFT00000024821.3	chr26:37886124C>T	.	c.322C>T	p.Arg108*	Stop-gained variant	1
OSUK9PADSQ	cPASC	VHL	ENSCAFT00000046552.2	chr20:8210993G>A	.	c.290C>T	p.Pro97Leu	Missense variant	0.248603
CCB010131	cPSCC	PTPN11	ENSCAFT00000014133.3	chr26:10052797G>T	.	c.1508G>T	p.Gly503Val	Missense variant	0.508393
OSULSCC1	cPSCC	BRAF	ENSCAFT00000006305.4	chr16:8296284T>A	.	c.1763T>A	p.Val588Glu	Missense variant	0.50494

## Sheet: Supplementary Table 10
Supplementary Table 10. Germline SNPs in COSMIC Tier 1 cancer genes identified by exome and panel sequencing in primary canine lung cancers.
Patient ID	Gene symbol	Transcript accession	Nucleotide (genomic)	rsID (dbSNP151)	DogSD AF	Nucleotide (cDNA)	Amino acid (protein)	Variant type	Variant germline zygosity	Variant tumor zygosity
CCB010387	CHRNA3	ENSCAFT00000002688	chr13:38339387G>GC	.	.	c.1237dupC	p.Arg413fs	Frameshift variant	Heterozygous	Heterozygous
CCB010387	CHRNA3	ENSCAFT00000002688	chr13:38339420C>A	.	0.04	c.1268C>A	p.Ala423Glu	Missense variant	Heterozygous	Heterozygous
CCB50354	CHRNA3	ENSCAFT00000002689	chr13:38339420C>A	.	0.04	c.1268C>A	p.Ala423Glu	Missense variant	Heterozygous	Heterozygous
CCB050354	CYP1B1	ENSCAFT00000009970	chr17:30277509C>G	.	0.03	c.278G>C	p.Arg93Pro	Missense variant	Homozygous	Homozygous
OSU431895	DNAH11	ENSCAFT00000004311	chr14:35518795G>A	.	0.08	c.2851G>A	p.Val951Ile	Missense variant	Heterozygous	Heterozygous
OSU431895	DNAH11	ENSCAFT00000004311	chr14:35533763C>T	.	.	c.4378C>T	p.Arg1460Trp	Missense variant	Heterozygous	Heterozygous
OSU396622	HER2	ENSCAFT00000025936	chr9:22761249C>T	.	0.04	c.3565G>A	p.Val1189Ile	Missense variant	Heterozygous	Heterozygous
OSU431895	HER2	ENSCAFT00000025936	chr9:22761249C>T	.	0.04	c.3565G>A	p.Val1189Ile	Missense variant	Heterozygous	Heterozygous

[truncated: 3 more sheets: Supplementary Table 11, Supplementary Table 12, Supplementary Table 13]
